# Supplementary material for: RNA Sequencing Reveals Upregulation of RUNX1-RUNX1T1 Gene Signatures in Clear Cell Renal Cell Carcinoma
Source: Hindawi journal article supplement (doi:10.1155/2014/450621), 2014-01-01

**Supplementary Table1. Summary of 17 ccRCC patients used for RNA sequencing and qRT-PCR**

| Patients ID | Age | Sex    | TNM     | Tumor Grade | Sample Type | Sample ID | RNA-seq | qRT-PCR |
|-------------|-----|--------|---------|-------------|-------------|-----------|---------|---------|
| HS09-9020   | 47  | Male   | T1bN0M0 | 2           | Normal      | HS1N      | Yes     | Yes     |
|             |     |        |         |             | Tumor       | HS1C      |         |         |
| HS09-9470   | 58  | Female | T1aN0M0 | 3           | Normal      | HS2N      | Yes     | Yes     |
|             |     |        |         |             | Tumor       | HS2C      |         |         |
| HS09-12586  | 64  | Male   | T1bN0M0 | 2           | Normal      | HS3N      | Yes     | Yes     |
|             |     |        |         |             | Tumor       | HS3C      |         |         |
| HS09-14456  | 44  | Female | T1bN0M0 | 3           | Normal      | HS4N      | Yes     | Yes     |
|             |     |        |         |             | Tumor       | HS4C      |         |         |
| HS09-21660  | 62  | Male   | T1aN0M0 | 1           | Normal      | HS5N      | Yes     | Yes     |
|             |     |        |         |             | Tumor       | HS5C      |         |         |
| HS10-1110   | 61  | Female | T1bN0M0 | 1           | Normal      | HS6N      | Yes     | Yes     |
|             |     |        |         |             | Tumor       | HS6C      |         |         |
| HS10-3063   | 61  | Male   | T1aN0M0 | 1           | Normal      | HS7N      | Yes     | Yes     |
|             |     |        |         |             | Tumor       | HS7C      |         |         |
| HS10-2142   | 48  | Male   | T1bN0M0 | 2           | Normal      | HS8N      | Yes     | Yes     |
|             |     |        |         |             | Tumor       | HS8C      |         |         |
| HS08-02026  | 51  | Female | T1aN0M0 | 3           | Normal      | HS9N      | No      | Yes     |
|             |     |        |         |             | Tumor       | HS9C      |         |         |
| HS08-20425  | 44  | Male   | T1bN0M0 | 3           | Normal      | HS10N     | No      | Yes     |
|             |     |        |         |             | Tumor       | HS10C     |         |         |
| HS07-24040  | 55  | Female | T3bN0M0 | 4           | Normal      | HS11N     | No      | Yes     |
|             |     |        |         |             | Tumor       | HS11C     |         |         |
| HS07-22442  | 49  | Male   | T3bN0M0 | 3           | Normal      | HS12N     | No      | Yes     |
|             |     |        |         |             | Tumor       | HS12C     |         |         |
| HS10-25343  | 62  | Male   | T1bN0M0 | 3           | Normal      | HS13N     | No      | Yes     |
|             |     |        |         |             | Tumor       | HS13C     |         |         |
| HS11-02644  | 75  | Male   | T1aN0M0 | 2           | Normal      | HS14N     | No      | Yes     |
|             |     |        |         |             | Tumor       | HS14C     |         |         |
| HS08-00671  | 44  | Male   | T2aN0M0 | 4           | Normal      | HS15N     | No      | Yes     |
|             |     |        |         |             | Tumor       | HS15C     |         |         |
| HS08-16961  | 56  | Male   | T2aN0M0 | 2           | Normal      | HS16N     | No      | Yes     |
|             |     |        |         |             | Tumor       | HS16C     |         |         |

**Supplementary Table 2. Summary of sequencing data for 8 paired ccRCC samples**

|        | Sample Type | Total reads | Unique mappers | None Unique Mappers | Total Mappers |
|--------|-------------|-------------|----------------|---------------------|---------------|
| Median | Normal      | 11840674    | 66.31%         | 26.70%              | 93.01%        |
|        | Tumor       | 16265923    | 66.16%         | 25.21%              | 92.48%        |
| Min    | Normal      | 3186698     | 60.39%         | 23.05%              | 91.01%        |
|        | Tumor       | 6745117     | 55.49%         | 18.96%              | 90.81%        |
| Max    | Normal      | 27215607    | 69.13%         | 31.69%              | 93.87%        |
|        | Tumor       | 20788570    | 73.94%         | 36.23%              | 93.33%        |

**Supplementary Table 3. Summary of sequencing data for each 8 paired ccRCC samples**

| Pat i e n t s I D | Sa m p l e I D | Tot a l r e a d s | U n i q u e m a p p e r s | N o n e U n i q u e M a p p e r s | Tot a l M a p p e r s | Tot a l C o v e r a g e |
|-------------------|----------------|-------------------|---------------------------|-----------------------------------|-----------------------|-------------------------|
| HS09-9020         | HS1N           | 1E+07             | 6903999<br>66.31%         | 2780134<br>26.70%                 | 9684133<br>93.00%     | 30.34                   |
|                   | HS1T           | 1.9E+07           | 1.3E+07<br>70.06%         | 4457233<br>23.20%                 | 17879280<br>93.30%    | 56.02                   |
| HS09-9470         | HS2N           | 3186698           | 1924600<br>60.39%         | 975459<br>30.60%                  | 2900059<br>91%        | 9.08                    |
|                   | HS2T           | 6745117           | 4607839<br>68.31%         | 1592387<br>23.60%                 | 6200226<br>91.90%     | 19.43                   |
| HS09-12586        | HS3N           | 8646510           | 5907843<br>68.32%         | 2201839<br>25.40%                 | 8109682<br>93.70%     | 25.41                   |
|                   | HS3T           | 9944835           | 6579550<br>66.16%         | 2617574<br>26.30%                 | 9197124<br>92.40%     | 28.82                   |
| HS09-14456        | HS4N           | 1.7E+07           | 1.1E+07<br>65.44%         | 4718113<br>27.50%                 | 1.6E+07<br>92.90%     | 49.92                   |
|                   | HS4T           | 1.3E+07           | 7847820<br>60.39%         | 4017213<br>30.90%                 | 1.2E+07<br>91.30%     | 37.18                   |
| HS09-21660        | HS5N           | 8632224           | 5765287<br>66.78%         | 2290340<br>26.50%                 | 8055627<br>93.30%     | 25.24                   |
|                   | HS5T           | 8156202           | 6030966<br>73.94%         | 1546596<br>18.90%                 | 7577562<br>92.90%     | 23.74                   |
| HS10-1110         | HS6N           | 2.1E+07           | 1.4E+07<br>65.99%         | 5631365<br>27.00%                 | 1.9E+07<br>93.00%     | 60.71                   |
|                   | HS6T           | 1.6E+07           | 9026590<br>55.49%         | 5892618<br>36.20%                 | 1.5E+07<br>91.70%     | 46.75                   |
| HS10-3063         | HS7N           | 1.2E+07           | 7224634<br>61.01%         | 3752065<br>31.60%                 | 1.1E+07<br>92.70%     | 34.39                   |
|                   | HS7T           | 1.9E+07           | 1.2E+07<br>65.59%         | 4769054<br>25.20%                 | 1.7E+07<br>90.80%     | 53.82                   |
| HS10-2142         | HS8N           | 2.7E+07           | 1.8E+07<br>67.75%         | 7106803<br>26.10%                 | 2.6E+07<br>93.80%     | 80.04                   |
|                   | HS8T           | 2.1E+07           | 1.3E+07<br>63.78%         | 6054283<br>29.10%                 | 1.9E+07<br>92.90%     | 60.52                   |

**Supplementary Table 4. Summary of reads counts data distribution for single gene for 8 paired ccRCC samples**

| Patients ID | Sample ID | Reads per Kilobase per Million Reads (RPKM) |       |       |       |        |        |        |
|-------------|-----------|---------------------------------------------|-------|-------|-------|--------|--------|--------|
|             |           | >50                                         | >5    | >2    | >1    | >0.5   | >0.25  | 0-0.25 |
| Median      | Normal    | 0.05%                                       | 1.11% | 3.00% | 6.28% | 12.15% | 21.06% | 56.30% |
|             | Tumor     | 0.08%                                       | 1.12% | 3.13% | 6.42% | 12.45% | 20.76% | 55.48% |
| Min         | Normal    | 0.02%                                       | 0.84% | 2.46% | 5.39% | 11.29% | 20.45% | 52.26% |
|             | Tumor     | 0.05%                                       | 1.04% | 2.90% | 5.97% | 11.77% | 20.24% | 51.42% |
| Max         | Normal    | 0.09%                                       | 1.64% | 4.19% | 7.40% | 12.83% | 22.30% | 59.55% |
|             | Tumor     | 0.14%                                       | 1.66% | 3.77% | 7.64% | 13.68% | 22.02% | 57.83% |
| HS09-9020   | HS1N      | 0.05%                                       | 1.09% | 2.93% | 6.28% | 12.24% | 21.11% | 56.30% |
|             | HS1C      | 0.05%                                       | 1.04% | 2.90% | 6.04% | 12.44% | 21.59% | 55.94% |
| HS09-9470   | HS2N      | 0.09%                                       | 1.64% | 4.19% | 7.40% | 12.79% | 21.62% | 52.26% |
|             | HS2C      | 0.12%                                       | 1.66% | 3.77% | 7.64% | 13.44% | 21.58% | 51.80% |
| HS09-12586  | HS3N      | 0.05%                                       | 1.11% | 3.04% | 6.34% | 12.05% | 21.06% | 56.35% |
|             | HS3C      | 0.08%                                       | 1.04% | 2.91% | 6.42% | 12.56% | 21.52% | 55.48% |
| HS09-14456  | HS4N      | 0.05%                                       | 1.22% | 3.15% | 6.28% | 12.15% | 20.88% | 56.26% |
|             | HS4C      | 0.14%                                       | 1.54% | 3.63% | 6.88% | 12.58% | 20.42% | 54.81% |
| HS09-21660  | HS5N      | 0.07%                                       | 1.16% | 3.00% | 6.41% | 12.57% | 22.04% | 54.74% |
|             | HS5C      | 0.11%                                       | 1.48% | 3.71% | 7.57% | 13.68% | 22.02% | 51.42% |
| HS10-1110   | HS6N      | 0.05%                                       | 1.14% | 3.14% | 6.33% | 12.15% | 20.83% | 56.36% |
|             | HS6C      | 0.06%                                       | 1.04% | 2.99% | 5.97% | 11.77% | 20.34% | 57.83% |
| HS10-3063   | HS7N      | 0.03%                                       | 0.84% | 2.46% | 5.39% | 11.29% | 20.45% | 59.55% |
|             | HS7C      | 0.07%                                       | 1.12% | 3.13% | 6.31% | 12.32% | 20.76% | 56.28% |
| HS10-2142   | HS8N      | 0.05%                                       | 1.10% | 2.93% | 5.98% | 11.89% | 20.77% | 57.28% |
|             | HS8C      | 0.10%                                       | 1.43% | 3.47% | 6.71% | 12.45% | 20.44% | 55.40% |

Sup table 5. Signatures significantly associated with ccRCC tumor and normal samples.

| Systematic Name <sup>a</sup> | Standard Name                      | # genes in term | # of difference expressed gene <sup>b</sup> | Contribution genes <sup>c</sup>                                                                                                                                                                                                                                                                                                                                                                                                                                                                                                   | Brief description <sup>d</sup>                                                                                         | Direction <sup>e</sup> | Padj <sup>f</sup> |
|------------------------------|------------------------------------|-----------------|---------------------------------------------|-----------------------------------------------------------------------------------------------------------------------------------------------------------------------------------------------------------------------------------------------------------------------------------------------------------------------------------------------------------------------------------------------------------------------------------------------------------------------------------------------------------------------------------|------------------------------------------------------------------------------------------------------------------------|------------------------|-------------------|
| M7363                        | ELVIDGE_HYPOXIA_UP                 | 369             | 58                                          | CADM1,HLA-DRB1,MX1,ISG20,INSIG2,SLC2A1,TGFB1,ZNF395,LOX,SAMD4A,S100A2,EGFR,STC2,OLFML2A,DDIT4,SPAG4,VEGFA,STC1,HOXA7,CYP1B1,ALDOC,AKAP12,SFXN3,SOX9,DAAM1,OBSL1,AHNAK2,SCARB1,NDRG1,ERO1L,ANGPTL4,KLF6,EMR2,GJA1,BNIP3,SPRY1,HEY1,P4HA1,CXCR4,LOXL1,NOL3,PFKP,CADM1,HLA-DRB1,MX1,ISG20,INSIG2,TGFB1,SLC2A1,ZNF395,LOX,SAMD4A,S100A2,EGFR,STC2,OLFML2A,DDIT4,SPAG4,VEGFA,STC1,ALDOC,AKAP12,SFXN3,SOX9,DAAM1,AHNAK2,OBSL1,NDRG1,ERO1L,ANGPTL4,KLF6,GJA1,BNIP3,SPRY1,HEY1,CXCR4,P4HA1,PFKP,CYB5A,ADM,CA9,PPFDMOG [PubChem=3080614] . | Genes up-regulated in MCF7 cells (breast cancer) under hypoxia conditions.                                             | up                     | 0                 |
| M9197                        | ELVIDGE_HYPOXIA_BY_DMOG_UP         | 279             | 49                                          | IA4,EGLN3,HK2,ENO2,PGF,PTGS1,EDN1,MX1,APOD,ZNF395,STC2,FER1L4,SPAG4,VEGFA,STC1,IDH2,LAMB1,SMA D6,NOTCH4,BNIP3,P4HA1,CHST15,TNFRSF10B,ADM,ARL4C,SPSB1,AXL,RASSF2,SLC2A3,TGFB1,LOX,FNDC3B,HLA-B,HLA-E,DDIT4,TNS1,COL1A2,TNFAIP3,FAM171A1,ABCA1,NDRG1,ERO1L,ANGPTL4,CUBN,CDKN1C,ALDH2                                                                                                                                                                                                                                                | Genes up-regulated in MCF7 cells (breast cancer) treated with hypoxia mimetic DMOG [PubChem=3080614] .                 | up                     | 0                 |
| M259                         | MANALO_HYPOXIA_UP                  | 427             | 60                                          | OSMR,FAM110C,MX1,INSIG2,SLC2A3,LOX,STC2,SPAG4,VEGFA,PFKFB4,ALDOC,PPP1R3C,NDRG1,ERO1L,ANGPTL4,SCD,NAMPT,BNIP3,SLC2A3,P4HA1,BHLHE41,LOC154761,NOL3,ADM,PPFIA4,HK2,PLIN2,ANKRD37,ENO2,PKD1,RNASE4,SOD2,PGK1                                                                                                                                                                                                                                                                                                                          | Genes up-regulated in response to both hypoxia and overexpression of an active form of HIF1A [GeneID=3091] .           | up                     | 0                 |
| M11033                       | MENSE_HYPOXIA_UP                   | 203             | 33                                          | LDHB,LDHA,PTGS2,EFNA1,PGF,EDN1,PTGS1,PGAM1,SYT7,MX1,STC2,KRT19,F3,ALDOA,PFKFB4,ALDOC,TPI1,LGALS1,KDR,IFI27,ETS1,PLAU,PPARA,BNIP3,P4HA1,TGFA,ANGPT2,ICAM1,MMP13,ADM,HLA-DQB1,HK2,MIF,THBS2,IGF2,LRP1,BIK,CP,PGK1,RPL36A,ENPEP,TGFB1,SLC16A1,SLC2A3,TGFB1,SLC2A1                                                                                                                                                                                                                                                                    | Hypoxia response genes up-regulated in both astrocytes and HeLa cell line.                                             | up                     | 0                 |
| M14072                       | WINTER_HYPOXIA_METAGENE            | 438             | 80                                          | ZNF395,STC2,UGCG,SIRPA,GRB10,NEK6,ALDOC,AKAP12,IFI30,ASB15,PEA15,PPP1R3C,OBSL1,KLF6,SCD,BNIP3,CANX,P4HA1,KCNMA1,PLIN2,SOD2,LRP1,NUPR1,SLC2A1,LOX,CA12,HIF1A,PI4K2A,MCL1,MDK,NDRG1,NDRG2,GAL3ST1,ANGPTL4,P4HB,CORO1A,FAM84A,HMOX1,A RHGAP8,TSKU,KHDRBS3,NOL3,SNX1                                                                                                                                                                                                                                                                  | Genes regulated by hypoxia                                                                                             | up                     | 0                 |
| M3996                        | JIANG_HYPOXIA_NORMAL               | 444             | 51                                          | ALDOA,PFKFB4,EFNA1,BNIP3,SLC7A5,SAP30,PLIN2,P4HA1,SLC2A3,SLC2A1,TGFA,MUC1,STC2,PFKP,DUSP1,F3                                                                                                                                                                                                                                                                                                                                                                                                                                      | Genes up-regulated in RPTEC cells (normal kidney) by hypoxia.                                                          | up                     | 0                 |
| M19622                       | LEONARD_HYPOXIA                    | 70              | 16                                          | LDHA,PTGS2,PGF,EDN1,BNIP3,L1CAM,ENPEP,TGFB1,SLC2A3,P4HA1,HMOX1,SLC2A1,TGFA,ANGPT2,CA12,PFKP,MMP13,HIF1A,ADM,CA9,F3,PKM2,STC1,ALDOA,VIM,HK2,MIF,TGM2,GAPDH,EPO,ENO1,FLT1,AK3,IGF2,CDKN1A,BIK,CP,PGK1,IGFBP2,IGFBP3                                                                                                                                                                                                                                                                                                                 | Genes up-regulated in HK-2 cells kidney tubular epithelium) under hypoxia and down-regulated on re-oxygenation.        | up                     | 0                 |
| M10508                       | HARRIS_HYPOXIA                     | 160             | 40                                          | HLA-DRB1,BNIP3,GJA1,MX1,ISG20,MAGED4,MAGED4B,INSIG2,P4HA1,CXCR4,SLC2A1,ZNF395,LOX,LOXL1,EGFR,NOL3,OLFML2A,ADM,CA9,SPAG4,STC1,PPFIA4,ALDOC,HK2,SFXN3,EGLN3,PLIN2,ENO2,AHNAK2,OBSL1,NDRG1,ERO1L,SCNN1B,ANGPTL4,PKD1,RNASE4,PGK1,IGFBP3                                                                                                                                                                                                                                                                                              | Genes known to be induced by hypoxia                                                                                   | up                     | 0                 |
| M2513                        | ELVIDGE_HIF1A_TARGETS_DN           | 195             | 38                                          | HLA-DRB1,MX1,INSIG2,SLC2A1,ZNF395,LOX,SAMD4A,EGFR,SPAG4,VEGFA,STC1,ALDOC,AKAP12,SFXN3,SOX9,OBSL1,AHNAK2,NDRG1,ERO1L,ANGPTL4,GJA1,BNIP3,MAGED4,MAGED4B,HEY1,CXCR4,P4HA1,LOXL1,NOL3,CYB5A,ADM,CA9,PPFIA4,EGLN3,HK2,GPRC5A,PLIN2,ENO2,SCNN1B,PKD1,RNASE4,DPYSL2,P                                                                                                                                                                                                                                                                    | Genes down-regulated in MCF7 cells (breast cancer) after knockdown of HIF1A [GeneID=3091] by RNAi.                     | up                     | 0                 |
| M6189                        | ELVIDGE_HIF1A_AND_HIF2A_TARGETS_DN | 221             | 44                                          | HLA-DRB1,MX1,INSIG2,SLC2A1,ZNF395,LOX,SAMD4A,EGFR,SPAG4,VEGFA,STC1,ALDOC,AKAP12,SFXN3,SOX9,OBSL1,AHNAK2,NDRG1,ERO1L,ANGPTL4,GJA1,BNIP3,MAGED4,MAGED4B,HEY1,CXCR4,P4HA1,LOXL1,NOL3,CYB5A,ADM,CA9,PPFIA4,EGLN3,HK2,GPRC5A,PLIN2,ENO2,SCNN1B,PKD1,RNASE4,DPYSL2,P                                                                                                                                                                                                                                                                    | Genes down-regulated in MCF7 cells (breast cancer) after knockdown of both HIF1A and HIF2A [GeneID=3091;2034] by RNAi. | up                     | 0                 |

|        |                                                 |     |    |                                                                                                                                                                                                                                                                     |                                                                                                                                                                                |    |          |
|--------|-------------------------------------------------|-----|----|---------------------------------------------------------------------------------------------------------------------------------------------------------------------------------------------------------------------------------------------------------------------|--------------------------------------------------------------------------------------------------------------------------------------------------------------------------------|----|----------|
| M14973 | SENESE_HDAC1_TARGETS_UP                         | 953 | 63 | OSMR,TFPI,ESM1,RAC2,ATP11A,RASSF8,ERRFI1,PRSS35,MYC,CCND2,G0S2,DEGS1,C3,GP R65,CCL20,BUB1,PHLDA1,PSAT1,TCFL5,NFE2L2,TNFAIP3,TNFRSF12A,SLC43A3,IFI16,COBL L1,IL6ST,VEGFA,LAMC2,SAA2,IGF2BP2,SLAMF7,ETS1,PLAU,CPEB4,TNFRSF11B,AGPAT9,TN FRSF10B,SLC39A14,PLIN2,BIRC3  | Genes up-regulated in U2OS cells (osteosarcoma) upon knockdown of HDAC1 [GeneID=3065] by RNAi.                                                                                 | up | 0        |
| M8776  | HELLER_SILENCED_BY_METHYLATION_U P              | 500 | 93 | L1CAM,ISG20,PRAME,NCF2,OLFML2B,IFI44,HLA-DQA2,HLA-DQA1,SSTR2,CX3CR1,TFPI,ABAT,HLA-DPA1,LAMC2,HLA-DRA,GCNT3,CYP1B1,HLA- DRB1,ENPP2,XIST,AKAP12,HSPA1A,IDH2,HLA-DRB6,HLA-DPB1,HLA- DOB,CHI3L1,SLAMF7,MCAM,CEL,IFI27,RGS1,CLEC7A,PLA2G4C,MSR1, TOP2A,ICAM1,HLA- DQB1,P | Genes up-regulated in at least one of three multiple myeloma (MM) cell lines treated with the DNA hypomethylating agent decitabine (5-aza-2'-deoxycytidine) [PubChem=451668] . | up | 0        |
| M7623  | HELLER_HDAC_TARGETS_SILENCED_BY_ METHYLATION_DN | 490 | 60 | ISG20,RPL10,PITX1,CCR2,ST14,BTN3A2,HSPA1A,OAS1,OAS2,HSPA1B,SERPINH1,TCF4,BLN K,SCD,S100A11,CLEC7A,GJA1,MYC,CEACAM1,FMNL1,MYCN,CCND1,CCND2,FKBP11,MYOM 2,CLEC2B,BCL2,PKD1,SHMT2,LRRRC41,CD180,QPCT,PSAT1,RBM3,SLC7A5,CDKN2A,CDKN2C ,DDIT4,SLC38A1,FGFR3,FXYS5,LAPTM5 | Genes down-regulated in multiple myeloma (MM) cell lines treated with both decitabine [PubChem=451668] TSA [PubChem=5562] .                                                    | up | 0        |
| M12272 | MISSIAGLIA_REGULATED_BY_METHYLATI ON_UP         | 200 | 33 | ATP1B1,PTGS2,ISG20,HIST1H2BK,IL1B,BST2,MFI2,HLA- E,TACSTD2,COL1A1,TNFAIP3,TNFAIP2,OAS1,OAS2,TIMP1,PLAT,UBE2L6,ITGA2,LGALS9,CD KN1A,QPRT,UBD,PRSS8,CCL20,LY6E,TAP1,IGF2,BIRC3,STAT1,SOD2,DUSP1,SLC6A8,IGFBP 3                                                        | Genes up-regulated in PaCa44 and CFPAC1 cells (pancreatic cancer) after treatment with decitabine [PubChem=451668]                                                             | up | 3.00E-04 |
| M18085 | LIANG_SILENCED_BY_METHYLATION_2                 | 72  | 17 | C3,UCHL1,OAS1,IFI44L,OAS2,CCL5,MMP1,CCL20,XAF1,ICAM1,STAT1,MCAM,IFIT3,DHRS2,T NFSF10,STC1,TNFAIP3                                                                                                                                                                   | Genes up-regulated in T24 cells (bladder carcinoma) after treatment with decitabine (5-aza-2'-deoxycytidine) [PubChem=451668] .                                                | up | 1.00E-04 |
| M13479 | TAKEDA_TARGETS_OF_NUP98_HOXA9_FU SION_10D_UP    | 397 | 70 | RARRES3,CADM1,PTGS2,ISG15,SERPINE2,TPSB2,RAB27B,GATM,SCN2A,LOC25845,IFI44,Z NF503,HS3ST3B1,RTP4,GNAI1,PCDH20,OAS1,OAS2,ARG2,HLA- DPB2,CDC42EP3,BTLA,OASL,IFI27,MIR155HG,FERMT2,ANGPT2,BATF3,TPSAB1,TPSB2,SAM D9L,LY6E,STAT1,LSP1,HPGD,CALB1,CXCL10,DNAJC6,TNFAIP6,  | Genes up-regulated in CD34+ [GeneID=947] hematopoietic cells by expression of NUP98-HOXA9 fusion [GeneID=4928;3205] off a retroviral vector at 10 days after transduction.     | up | 2.00E-04 |
| M6670  | TAKEDA_TARGETS_OF_NUP98_HOXA9_FU SION_3D_UP     | 370 | 62 | ATP1B1,PTGS2,CRHBP,PTGS1,RNF213,CXCL10,ISG15,CH25H,LOX,RAB27B,BST2,DTX3L,CR ISP2,SCN2A,ZNF503,SERPINE1,IFI44,MECOM,AHR,PARP14,GBP3,GBP1,IFIH1,OAS1,O AS2,IFI35,CMPK2,HOXA3,HOXA6,HOXA7,HOXA9,S100A10,HOXB3,CDKN1C,IFI27,OASL,PARP 9,QPRT,SLC5A3,IFI44L,HEY1,TR      | Genes up-regulated in CD34+ [GeneID=947] hematopoietic cells by expression of NUP98-HOXA9 fusion [GeneID=4928;3205] off a retroviral vector at 3 days after transduction.      | up | 5.00E-04 |
| M7388  | TAKEDA_TARGETS_OF_NUP98_HOXA9_FU SION_10D_DN    | 299 | 42 | SLC7A8,TLR7,C1QC,MMP1,PPP1R1B,TGFBI,MS4A2,GGTA1,OLFML2B,C1QA,C1QB,TACSTD2 ,CST7,ST14,CLEC5A,CCL4,FOLR3,BLNK,CHI3L1,CCL3,CCL3L1,RIT1,KCNJ15,NRP1,PTGER3, PADI2,MMP12,BPI,PLA2G7,TREM2,HS3ST2,FPR3,RAB42,CD24,GPNMB,PKK4,DACH1,ANXA3, CCL18,RASSF4,TEX15,SLFN13       | Genes down-regulated in CD34+ [GeneID=947] hematopoietic cells by expression of NUP98-HOXA9 fusion [GeneID=4928;3205] off a retroviral vector at 10 days after transduction.   | up | 7.00E-04 |
| M9740  | TAKEDA_TARGETS_OF_NUP98_HOXA9_FU SION_8D_DN     | 416 | 51 | C1QC,PPP1R1B,NCF2,HLA- DQA1,C1QA,C1QB,CLEC5A,SLC11A1,PPP1R3B,CHI3L1,ETS1,CLEC7A,NRP1,SOBP,SERPINA 1,KCNMA1,MMP14,MMP12,CD163,PLA2G7,SERPINE1,FPR3,GLIPR2,CD24,PKK4,TEX15,FCG R2B,FCGR2C,CD14,IL10,MMP1,TGFBI,MS4A2,ELOVL7,KRT86,ENC1,PNPLA1,CST7,CLU,ST8S IA1,FOLR3 | Genes down-regulated in CD34+ [GeneID=947] hematopoietic cells by expression of NUP98-HOXA9 fusion [GeneID=4928;3205] off a retroviral vector at 8 days after transduction.    | up | 0        |
| M15057 | HENDRICKS_SMARCA4_TARGETS_UP                    | 98  | 14 | TPM1,MMP1,ATP2B4,SERPINE2,AGT,PTPN7,LGALS1,PSG9,CDKN1A,ITGA5,PSG5,PSG4,ARL 4C,CTSH                                                                                                                                                                                  | Genes up-regulated in ALAB cells (breast cancer) upon reintroduction of SMARCA4 [GeneID=6597] expressed off adenoviral vector.                                                 | up | 0.0069   |
| M7914  | HENDRICKS_SMARCA4_TARGETS_DN                    | 84  | 11 | NRP2,NRP1,LUM,KCNJ2,CD74,MYC,SFTPB,ARHGDI3,LGALS3,HPGD,HLA-DRA                                                                                                                                                                                                      | Genes down-regulated in ALAB cells (breast cancer) upon reintroduction of SMARCA4 [GeneID=6597] expressed off adenoviral vector.                                               | up | 0.0128   |

|        |                                                      |      |     |                                                                                                                                                                                                                                                                 |                                                                                                                                |    |        |
|--------|------------------------------------------------------|------|-----|-----------------------------------------------------------------------------------------------------------------------------------------------------------------------------------------------------------------------------------------------------------------|--------------------------------------------------------------------------------------------------------------------------------|----|--------|
| M1804  | WANG_SMARCE1_TARGETS_UP                              | 346  | 42  | CADM1,TGFB1,FAP,GATA3,TGFB1,MATN2,CA12,FRY,GRB10,COL1A1,PMP22,ABCA1,WT1,FN1,PLAT,PLAG1,CHI3L1,KLRC1,KLRC2,HOXB5,HOXB6,NTRK2,MARCKS,PRRX1,BCAM,INHBB,STOM,CA4,VCAN,LUM,COL3A1,DCN,CLEC2B,ACAN,CD24,RNASE4,COL15A1,MAN1C1,TMEM2,NUPR1,SULF1,F2R                   | Genes up-regulated in BT549 cells (breast cancer) by expression of SMARCE1 [GeneID=6605] off a retroviral vector.              | up | 0.0248 |
| M4780  | WANG_SMARCE1_TARGETS_DN                              | 765  | 52  | PDHA1,APOO,S100A2,PRAME,STC2,CYP1B1,BDKRB1,HSPA1A,CD70,DENND2A,BDKRB2,LIF,TPD52L1,IFI27,LAMA4,BNIP3,TNFRSF11B,IL4R,DLEU2,HSPA1A,HSPA1B,HK2,GNG11,LY6E,TBC1D4,MXRA5,SOD2,TNFRSF6B,DUSP9,SPON2,HADH,EGFR,BST2,HLA-C,HLA-B,CSTB,SLITRK5,PRR7,PSMB8,PSMB9,PLK2,UCHL | Genes down-regulated in BT549 cells (breast cancer) by expression of SMARCE1 [GeneID=6605] off a retroviral vector.            | up | 0.0019 |
| M4196  | NUYTEN_EZH2_TARGETS_UP                               | 1950 | 210 | LDHA,B2M,TMEM140,ISG20,SERPINE2,ZNF395,RAB27B,NFKBIE,PEA15,AHNAK2,UBE2L6,PARP9,BNIP3,FGF1,PRSS35,ERRF1,CEACAM1,MMP13,ARL4C,TRIM14,PKD1,TRIM21,TMEM2,ACC2,CXCL10,TGFB1,IL1B,IL15RA,FNDC3B,HLA-H,HLA-C,HLA-B,HLA-E,HLA-G,HLA-F,VAMP4,IL32,MEIS2,NTN4,CDKN1A,SLC   | Genes up-regulated in PC3 cells (prostate cancer) after knockdown of EZH2 [GeneID=2146] by RNAi.                               | up | 0      |
| M4723  | TONKS_TARGETS_OF_RUNX1_RUNX1T1_FUSION_HSC_DN         | 407  | 59  | ADCY7,PDLIM1,CD52,AQP3,KCNK5,SMOX,MGAT1,CD36,PMP22,BIN2,CYP1B1,DUSP10,TYROBP,LGALS1,SASH3,NOD2,PRG2,MYCN,CCND1,SLC27A2,TPCN1,IL10RA,BIRC3,RASSF2,FCGR2A,SLC7A5,GATA2,ANK1,TGFB1,PDJK,CST7,CSTA,ITGAL,LST1,LAPTM5,SLC48A1,RUNX3,TEAD3,TARP,EMR2,NKG7,E2F8,SLA,SL | Genes down-regulated in normal hematopoietic progenitors by RUNX1-RUNX1T1 [GeneID=861;862] fusion.                             | up | 0      |
| M12138 | TONKS_TARGETS_OF_RUNX1_RUNX1T1_FUSION_ERYTHROCYTE_UP | 331  | 54  | CRHBP,TLR2,TLR7,SLC2A5,MALL,CH25H,FNDC3B,SOC3,IFI44,SIRPA,LILRB1,COL1A2,VSIG4,CLEC5A,GBP2,NETO2,C3AR1,PALM,ENPP2,OAS2,HOXA9,NDRG1,PLAT,LPL,KLF6,TMEM110,DNAE2,PLK2,QPRT,SLC5A3,UCHL1,ACVR1B,SLC1A3,SERPINA1,LAIR1,PRG2,DHRS9,IFI6,VAT1,CD163,FCGR1A,FCGR1C,V    | Genes up-regulated in erythroid lineage cells by RUNX1-RUNX1T1 [GeneID=861;862] fusion .                                       | up | 0      |
| M11428 | GAURNIER_PSM4_TARGETS                                | 120  | 33  | HLA-DMB,CXCL11,HLA-DMA,TGFB1,CXCL10,B2M,HLA-H,RELB,HLA-A,HLA-C,HLA-B,HLA-E,HLA-DQA1,HLA-G,HLA-F,CCR5,HLA-DPA1,HLA-DRA,HLA-DQB1,C3AR1,HLA-DQB2,CCL3,HLA-DRB1,C3,CXCL9,CCL5,CCL20,HLA-DRB5,HLA-DPB1,HLA-DPB2,HLA-DOA,CCL18,CXCL16                                 | Inflammatory cytokines                                                                                                         | up | 0      |
| M14801 | HOOL_ST7_TARGETS_DN                                  | 257  | 35  | APOBEC3G,MMP1,MCOLN3,VASH1,COL1A1,APOBEC3F,RBP4,LOC400931,PFKFB4,RPS27,PPP1R3B,PPL,OBSL1,NDRG1,ANGPTL4,FN1,MCAM,KDR,CXCL16,PCSK1N,NNMT,SPRY4,CXCR4,MMP13,DHRS2,SRGAP3,PLA2G7,PPFIA4,VIM,FAM46C,ENO2,PKD1,RNASE4,SPARC,SLC14A1                                   | Genes down-regulated in PC-3 cells (prostate cancer) stably expressing ST7 [GeneID=7982] off a plasmid vector.                 | up | 0      |
| M14958 | PRAMOONJAGO_SOX4_TARGETS_UP                          | 112  | 19  | BNIP3,MXI1,INSIG2,CXCR4,SLC2A3,IL1B,STC2,GRB10,ADM,VEGFA,STC1,TNFAIP3,TRIB3,GP5,RC5A,PLIN2,NDRG1,PHLDA1,SOD2,RIT1                                                                                                                                               | Genes up-regulated in ACC3 cells (adenoid cystic carcinoma) after knockdown of SOX4 [GeneID=6659] by RNAi.                     | up | 0      |
| M12391 | DAUER_STAT3_TARGETS_UP                               | 78   | 14  | C3,EFNA1,AKAP12,ABCA1,FGG,FGA,SLC2A3,AGT,LBP,SAMD4A,ICAM1,UGCG,SOD2,ADM                                                                                                                                                                                         | Top 50 genes up-regulated in A549 cells (lung cancer) expressing STAT3 [GeneID=6774] off an adenovirus vector.                 | up | 0      |
| M11951 | HINATA_NFKB_TARGETS_KERATINOCYTE_UP                  | 144  | 26  | EFNA1,CXCL11,MMP1,CXCL10,IL1B,TNIP1,EGFR,ICAM1,MMP14,TNFAIP6,VEGFA,TNFAIP3,TNFAIP2,GBP1,TNC,VIM,ESM1,CCL5,CYP27B1,CCL20,TAP1,FN1,ARHGDB,PLAT,SOD2,CDKN1A                                                                                                        | Genes up-regulated in primary keratinocytes by expression of p50 (NFKB1) and p65 (RELA) [GeneID=4790;5970] components of NFKB. | up | 0      |
| M15491 | HAN_SATB1_TARGETS_DN                                 | 664  | 75  | PTGS2,OSMR,FSTL1,ISG20,INSIG2,MATN2,CD40,SPAG4,F3,GRAP2,PMP22,GNAI1,ALDOC,OAS1,SERPINH1,LIF,ZAP70,LAMB1,HLA-DOA,PLAT,SYNGR3,APOL2,APOL3,NNMT,BNIP3,P4HA1,ADM,FHL1,TPCN1,BCAS4,TMEM2,QPCT,DUSP1,CDH16,MPZL2,ARNT2,MMP1,SLC16A1,MCOLN3,SLC2A3,TGFB1,IL1B,FNDC3B,P | Genes down-regulated in MDA-MB-231 cells (breast cancer) after knockdown of SATB1 [GeneID=6304] by RNAi.                       | up | 0      |
| M2310  | DANG_REGULATED_BY_MYC_DN                             | 488  | 67  | SCPEP1,EDN1,FSTL1,CTGF,PLA1A,CD3E,CRYAB,PRKCDBP,PTPRN,F3,VEGFA,PMP22,ERBB2,AKAP12,SFXN3,OAS1,IFI35,SLC11A1,PEA15,GAS1,JPH2,CANX,DLEU2,MYC,ERRF1,LYZ,CND1,ADM,CKAP2L,SERPINB1,COL3A1,GPM6B,MT1A,CHP,DUSP1,FBLN5,WFS1,CSPG4,PM AIP1,TGFB1,CXCL10,SLC2A5,CDKN2B,S  | Genes down-regulated by MYC [GeneID=4609]                                                                                      | up | 0      |

|        |                                                          |      |     |                                                                                                                                                                                                                                                                                     |                                                                                                                                                              |      |   |
|--------|----------------------------------------------------------|------|-----|-------------------------------------------------------------------------------------------------------------------------------------------------------------------------------------------------------------------------------------------------------------------------------------|--------------------------------------------------------------------------------------------------------------------------------------------------------------|------|---|
| M1973  | HORIUCHI_WTAP_TARGETS_UP                                 | 661  | 69  | RARRES3,MGC21881,OSMR,PTGS1,SERPINE2,RAPGEF5,ERAP1,SMOX,H1F0,STC2,APOLD1,SIPA1L2,ZNF503,IFI44,PITPNM3,TFPI,BTN3A3,PMP22,SLC2A12,EMCN,GCNT2,KCNJ2,PPP1R3C,PCDH17,APOL1,RTT1,HTATIP2,TGFA,CEACAM1,ICAM1,BIRC3,SOD2,QPCT,SELE,TLR3,CXCL11,TAPBP,KLHL6,PAPPA,SLC2A3                     | Genes up-regulated in primary endothelial cells (HUVEC) after knockdown of WTAP [GeneID=9589] by RNAi.                                                       | up   | 0 |
| M78    | EBAUER_TARGETS_OF_PAX3_FOXO1_FUSION_UP                   | 441  | 43  | AQP6,ISG15,CRYAB,CD36,CCR5,EPS8L1,LIF,AHNAK2,KLF6,SCD,TPD52L1,TNNI1,ARHGEF6,SRGAP3,SERPINB1,FHL1,PLEK,GJB1,RASSF4,TUBAL3,ATP6V0A4,TNNC1,LRTM1,CXCL10,SPN,HLA-A,TNS1,COL1A1,TNFAIP2,IL32,GPR37,SST,BCAN,CASQ2,CTF1,ABLIM3,EGLN3,DCN,EHBP1L1,TPM1,HRH1,TGM2,PNO                       | Genes up-regulated in Rh4 cells (alveolar rhabdomyosarcoma)                                                                                                  | up   | 0 |
| M5672  | SU_KIDNEY                                                | 32   | 10  | SLC12A1,CUBN,KL,SLC6A13,ENPEP,XPNPEP2,KCNJ1,AQP2,SLC17A1,POU3F4                                                                                                                                                                                                                     | Genes up-regulated specifically in human kidney tissue.                                                                                                      | down | 0 |
| M5466  | WINTER_HYPOXIA_UP                                        | 204  | 29  | LDHA,PGF,PGAM1,BNIP3,SLC16A1,P4HA1,SLC2A1,CA12,CA9,VEGFA,TFAP2C,ALDOA,PFKB4,IGF2BP2,MIF,PLEKHG3,TP1,PSMB7,ANKRD37,NDRG1,GAPDH,ANGPTL4,NDUFA4L2,S100A10,HOMER1,SLC6A8,PYGL,PGK1,PLAU                                                                                                 | Genes up-regulated in head and neck tumor samples which clustered around known hypoxia genes.                                                                | up   | 0 |
| M14371 | NAKAMURA_TUMOR_ZONE_PERIPHERAL_VS_CENTRAL_DN             | 1349 | 125 | PTGS2,MGC21881,MX1,RPL10,ZNF395,RAB27B,FAM108C1,UGCG,TFPI,NPHP3,RAC2,ARG2,AHNAK2,OBSL1,GAS1,ACAD11,CACHD1,BNIP3,P4HA1,ST6GALNAC2,SERPINB1,FOXC1,KSR1,C3,HK2,PCDHB14,RPL37,PCDHB10,CCL20,PCSK6,PKD1,SHMT2,TRIM29,TMPRSS4,DUSP1,CP,MOBK12A,SEZ6L2,UNC5B,SLC2A3,F                      | Down-regulated genes in peripheral zone of human pancreatic cancer growing in the pancreas of nude mice compared to that of the tumor from the central zone. | up   | 0 |
| M12225 | PICCALUGA_ANGIOIMMUNOBLASTIC_LYMPHOMA_UP                 | 434  | 81  | PGF,FSTL1,C1QC,LIFR,SERPING1,C1QA,C1QB,PMP22,EMCN,CYP1B1,ENPP2,SERPINH1,JDH1,LAMB1,CCDC80,CHI3L1,CD63,LAMA4,IFI27,RGS5,MARCKS,PLA2G4C,NNMT,FERMT2,GJA1,KCNJ10,NR2F2,KCNMA1,PTGDS,C7,C3,COL3A1,CXCL9,SAMD9L,GJC1,CCL21,FLRT2,HSPG2,COL15A1,MXRA5,P2RY13,RASSF4,APGAM1,B2M,ISG15,HLA- | Up-regulated genes in angioimmunoblastic lymphoma (AILT) compared to normal T lymphocytes.                                                                   | up   | 0 |
| M12490 | ONKEN_UVEAL_MELANOMA_UP                                  | 1659 | 132 | DRA,PEA15,AHNAK2,LAPTM4B,RGS5,HTATIP2,LZTS1,FGF9,LYN,LRP1,SAMD4A,HLA-J,PDXK,HLA-C,HLA-B,HLA-E,HLA-G,HLA-F,IFITM3,MEIS2,CDKN1A,SLC1A4,C4A,CASP1,IFI16,PKM2,CADM1,APOD,PRKCDBP,FRY,C1QA,C1QB,BTN3A3,SFXN3,CD74,IDH2,TYROBP,KDR,ETS2,FKBP11,RI                                         | Genes up-regulated in uveal melanoma: class 2 vs class 1 tumors.                                                                                             | up   | 0 |
| M14539 | BERTUCCI_MEDULLARY_VS_DUCTAL_BREAST_CANCER_UP            | 442  | 51  | ERAP1,GBP5,BTN3A1,BTN3A3,NFKBIE,IFI30,HLA-DOB,MKI67,RGS1,CLEC7A,MIR155HG,LAG3,RAP2B,ICAM1,GZMA,ANKRD22,CLEC2D,PCSK6,BIRC3,STAT1,SOD2,DRAM1,TLR2,MCM10,IL15RA,SOCS3,DTX3L,RELB,CSDA,GBP4,TNFAIP2,IL32,TAGAP,IL12RB1,STAMBPL1,PSMB8,PSMB9,KLRC1,KLRC2,NBN,HCP5,CT                     | Genes up-regulated in medullary breast cancer (MBC) relative to ductal breast cancer (DBD).                                                                  | up   | 0 |
| M17471 | SCHUETZ_BREAST_CANCER_DUCTAL_INVASIVE_UP                 | 739  | 128 | HLA-DMA,HLA-DMB,ADCY7,FSTL1,CD53,SERPINE2,CTGF,FAP,CH25H,OLFML2B,SERPING1,PRKCDBP,HLA-DQA1,C1QA,C1QB,HLA-DPA1,HLA-DRA,IFI30,ESM1,KCNJ2,SERPINH1,CD74,FCER1G,AHNAK2,HLA-DRB6,HLA-DPB1,TCF4,LAMB1,TYROBP,LGALS1,GAS1,KDR,LAMA4,RGS1,SRPX2,CLEC7A,PLAU,NNMT,NRP1,M                     | Genes up-regulated in invasive ductal carcinoma (IDC) relative to ductal carcinoma in situ (DCIS)                                                            | up   | 0 |
| M19875 | SENGUPTA_NASOPHARYNGEAL_CARCINOMA_UP                     | 592  | 73  | PTGS2,ZNRF3,CDCA7,ERAP1,EFNB2,UHRF1,ZWINT,ARHGAP8,IDH1,LAMB1,GAD1,CHI3L1,PLAU,NPNT,FERMT1,GJA1,DLEU2,ANGPT2,FCGR3B,TOP2A,KCNMA1,FMNL2,GZMA,GZMB,GZMH,TNFRSF10B,ANKRD22,PLA2G7,VCAN,SLC39A14,COL3A1,CXCL9,FCGR1B,COL15A1,STAT1,FZD7,RASSF4,FCGR2A,DRAM1,CD14,ARN                     | Genes up-regulated in nasopharyngeal carcinoma relative to the normal tissue.                                                                                | up   | 0 |
| M10165 | TURASHVILI_BREAST_LOBULAR_CARCINOMA_VS_DUCTAL_NORMAL_UP  | 136  | 27  | PRRX1,ENPEP,EDNRA,CXCR4,GPX8,LOX,RAP2C,CILP,LYZ,IFI44,PLXDC1,COL1A2,VCAN,COL1A1,COL3A1,TAGAP,HSPA6,WIPF1,LAMB1,THBS2,FN1,SPARC,COL5A2,MXRA5,RGS1,SFRP2,SULF1                                                                                                                        | Genes up-regulated in lobular carcinoma vs normal ductal breast cells.                                                                                       | up   | 0 |
| M13547 | TURASHVILI_BREAST_LOBULAR_CARCINOMA_VS_LOBULAR_NORMAL_DN | 147  | 23  | PRRX1,CXCR4,DLEU2,LOX,UGCG,LYZ,IFI44,COL1A2,VCAN,COL1A1,BTN3A3,LCP2,COL3A1,TAGAP,WIPF1,LAMB1,THBS2,FN1,EPPK1,COL5A2,MXRA5,RGS1,SFRP2                                                                                                                                                | Genes down-regulated in lobular carcinoma vs normal lobular breast cells.                                                                                    | up   | 0 |



|        |                                                      |      |     |                                                                                                                                                                                                                                                                                                                                                                                                                                                                                                                                                                                                                                                                                                                                                                                                                                                                                                                                                                                                                                                                                                                          |                                                                                                                                 |    |   |
|--------|------------------------------------------------------|------|-----|--------------------------------------------------------------------------------------------------------------------------------------------------------------------------------------------------------------------------------------------------------------------------------------------------------------------------------------------------------------------------------------------------------------------------------------------------------------------------------------------------------------------------------------------------------------------------------------------------------------------------------------------------------------------------------------------------------------------------------------------------------------------------------------------------------------------------------------------------------------------------------------------------------------------------------------------------------------------------------------------------------------------------------------------------------------------------------------------------------------------------|---------------------------------------------------------------------------------------------------------------------------------|----|---|
| M4785  | FULCHER_INFLAMMATORY_RESPONSE_L<br>ECTIN_VS_LPS_DN   | 1028 | 127 | TMEM140,ISG20,GATM,OLFML2B,SERPING1,SPIRE1,LPCAT1,HIST1H2BK,UBE2L6,APOL3,C<br>D300A,MARCKS,BNIP3,PIK3AP1,PARVG,RAP2B,LYN,SORT1,GNB4,ARL4C,TRIM14,DAPP1,RN<br>ASET2,TBC1D2,LILRA6,LILRB3,DUSP1,RNF19B,CXCL11,IL10,CXCL10,TGFB1,IL15RA,FCGR3A<br>,FCGR3B,SAMD4A,TNFAIP6,MNDA,<br>HLA-DMA,HLA-DMB,SERPINE2,SPIRE1,HLA-DPA1,HLA-<br>DRA,NPY6R,PPP1R3C,PPP1R3B,RAC2,ALDH4A1,CDC42EP3,MSR1,HTATIP2,FGF1,ANGPT2,L<br>YN,LYZ,INHBB,CLIC5,VCAN,FPR3,MYOM3,PHLDA1,PKD1,P2RY13,CP,HLA-<br>DRB1,CXCL12,FCGR3A,FCGR3B,CECR1,HLA-<br>C,VSNL1,MNDA,MFAP4,C3AR1,CCL4,ANGPT1,A                                                                                                                                                                                                                                                                                                                                                                                                                                                                                                                                                            | Genes down-regulated in monocyte-<br>derived dendritic cells (MDDC) after<br>stimulation with galectin-1 (lectin)               | up | 0 |
| M3654  | THUM_SYSTOLIC_HEART_FAILURE_UP                       | 908  | 125 | RARRES3,CD52,GIT2,KLRD1,CRTAM,CD3D,LPAR6,HLA-DPA1,PRDM1,SFXN3,HIP1R,HLA-<br>DPB1,IKZF3,SYNE1,TGFB3,LEPROTL1,TBX21,RAP2C,GZMA,GZMB,GZMH,GZMK,GNB5,DE<br>GS1,SGCB,PRF1,FHL1,GPR65,GNG11,DAPP1,CLEC2B,BCL2,TBC1D4,KIF21B,MT1H,BIRC3,M<br>T1X,HPGD,KIAA0748,PMAIP1,TCEAL2,APOB                                                                                                                                                                                                                                                                                                                                                                                                                                                                                                                                                                                                                                                                                                                                                                                                                                               | Genes up-regulated in samples with<br>systolic heart failure compared to normal<br>hearts.                                      | up | 0 |
| M12570 | DEURIG_T_CELL_PROLYMPHOCYTIC_LEU<br>KEMIA_DN         | 681  | 77  | PTGS2,OSMR,FSTL1,B2M,SERPINE2,FAP,CRYAB,SIRPA,F3,GNAI1,RAC2,CDC42EP3,CCDC8<br>0,GAS1,FMNL2,LYN,MMP14,ANXA2P2,C3,FHL1,ITM2C,MT1H,MT1G,PHLDA1,MT1F,TRIM29,A<br>XL,MT1X,PSAT1,TGFB1,FNDC3B,RNF145,EGFR,CSDA,HLA-<br>E,HIF1A,AKR1B10,VSNL1,NFE2L2,TNFAIP3,PTK7,GABRE,CYB5R3,SLC<br>LDHB,PTGS2,OSMR,FSTL1,SERPINE2,TFPI,PMP22,GNAI1,AHNAK2,AIDA,APCDD1L,KIAA1949<br>,FMNL2,LYN,ANXA2P2,CKAP2L,G0S2,FOXO1,FHL1,GNG11,ITM2C,GLIPR2,BUB1,WIPF1,PHLD<br>A1,FLRT2,AXL,DNM1,TGFB1,SH2D5,CDKN2C,TGFB1,RNF145,EGFR,TNFAIP3,LRRK1,TIMP1,T<br>UBB,CASP1,LOXL1,IFI16,VIM,H                                                                                                                                                                                                                                                                                                                                                                                                                                                                                                                                                               | Genes down-regulated in T-PLL cells (T-<br>cell prolymphocytic leukemia) bearing the<br>inv(14)t(14:14) chromosomal aberration. | up | 0 |
| M14507 | CHARAFE_BREAST_CANCER_LUMINAL_VS<br>_BASAL_DN        | 943  | 106 | TLR2,FSTL1,SLC2A3,FAP,LOX,STC2,MOXD1,PRELP,TNFAIP6,COL1A2,C3AR1,CYP1B1,APOC<br>1,ESM1,FN1,HAVCR2,LPL,GAS1,SFMBT2,SFRP2,PLAU,SLC5A3,MSR1,PRRX1,EDNRA,SLC2A<br>3,SLC1A3,HEY1,TRIM6,HLA-<br>DQB1,ANGPT2,CD163,PLA2G7,VCAN,GNB4,ARL4C,SNX10,COL3A1,PIK3R5,GPNMB,THBS2,A<br>XL,COL15                                                                                                                                                                                                                                                                                                                                                                                                                                                                                                                                                                                                                                                                                                                                                                                                                                          | Genes down-regulated in luminal-like<br>breast cancer cell lines compared to the<br>basal-like ones.                            | up | 0 |
| M9192  | CHARAFE_BREAST_CANCER_LUMINAL_VS<br>_MESENCHYMAL_DN  | 923  | 91  | AQP9,TLR2,CXCL11,SLC7A5,TGFB1,TLR8,APOB,SLC2A3,TGFB1,ZNF395,NCF2,FBP1,TNS1,V<br>EGFA,PMP22,C3AR1,CHKA,CYP1B1,ARHGAP8,CLU,ABCA1,P2RY2,CDA,CHI3L1,MCAM,SYNG<br>R3,ABCG1,CDKN1A,RGS1,ADAP2,EMR2,PLAU,KCNJ15,MARCKSL1,IL21R,SLA,NOD2,CD93,H<br>MOX1,SHC1,IFNGR2,CSF2RA,ABCB1,AD<br>SELENBP1,AQP3,ISG20,S1PR5,NCF2,CD3D,CD36,VSIG1,CX3CR1,OLFM4,CYP1B1,IFI30,ZAP<br>70,FCER1G,TYROBP,LGALS3,CHI3L1,RGS1,ETS1,TGFB3,CLEC7A,MPEG1,SERPINA1,FCG<br>R3B,GZMA,LYZ,GZMB,GZMH,CD163,GZMK,PLXDC1,VCAN,ARL4C,PRF1,GPR65,FAM46C,IL10<br>RA,QPCT,FCGR2A,CD14,TOB1,SLC2A3,<br>LDHA,RPLP0,PDHA1,SSTR2,ZWINT,PMP22,SGIP1,PPAPDC1A,AIDA,MMP12,VCAN,DEGS1,FP<br>R3,AXL,PSAT1,CXCL11,CXCL10,IL15RA,FNDC3B,C3AR1,CCL4,RNF165,GLT25D1,KIF23,SLC1<br>A3,UQCRH,SNX10,FKBP5,COL27A1,SCNN1G,XAF1,COL5A2,SCD5,TREX2,IFI44,C1QB,ARHG<br>AP8,PRR5,LMMNB1,ARHGAP8,NEK2,EP<br>L1CAM,RAB27B,UGCG,SPIRE1,SERPINH1,AHNAK2,CDC42EP3,GAS2L3,ARHGAP11A,RNF175<br>,ANXA2P2,VCAN,ARL4C,HK2,COL7A1,SHMT2,CCNB1,PSAT1,SLC7A5,TGFB1,EIF4EBP1,CDK<br>N2A,SLC2A1,ASPM,EGFR,ENC1,TFAP2A,TNFRSF12A,PLK2,NBN,NXPH4,E2F7,SLFN5,SLC1A<br>4,CASP4,NUSAP1,IFI16,HRH1,XAF1,PLP | Genes down-regulated in luminal-like<br>breast cancer cell lines compared to the<br>mesenchymal-like ones.                      | up | 0 |
| M17079 | VECCHI_GASTRIC_CANCER_ADVANCED_V<br>S_EARLY_UP       | 342  | 49  | FSTL3,FAP,KCNK5,TPSB2,NCF2,C4A,ST14,CYP1B1,ATP11A,MSR1,SERPINA1,FGF1,LYN,INH<br>BB,CCND1,CCND2,G0S2,C3,TRIM14,TRIM29,CCL18,QPCT,SLC7A5,CPA3,STMN2,ENC1,TMS<br>B10,TNFAIP6,MNDA,COL1A1,C3AR1,APOC1,PTK7,MDK,TIMP1,ARHGDI1,MUC1,B3GAT1,CDK<br>N1A,PC,HMOX1,HEY2,PKM2,DDB2,TRE                                                                                                                                                                                                                                                                                                                                                                                                                                                                                                                                                                                                                                                                                                                                                                                                                                              | Up-regulated genes distinguishing<br>between two subtypes of gastric cancer:<br>advanced (AGC) and early (EGC).                 | up | 0 |
| M986   | SMIRNOV_CIRCULATING_ENDOTHELIOCY<br>TES_IN_CANCER_UP | 333  | 55  | ISG20,ACTG2,CTGF,CH25H,FOXF1,CRTAM,C4A,SERPING1,SIRPA,PMP22,HLA-DRA,HLA-<br>DRB1,NFKBIE,RAC2,ZAP70,HLA-DRB5,HLA-DRB6,HLA-<br>DPB1,TCF4,CDC42EP3,CCDC80,RGS5,SERPINA3,PARVG,KIAA1949,LYZ,CPXM1,ARL4C,HLA-<br>DQB1,FHL1,GNG11,GLIPR2,MT1E,MT1H,MT1G,SELL,COL15A1,PDZRN3,MT1X,                                                                                                                                                                                                                                                                                                                                                                                                                                                                                                                                                                                                                                                                                                                                                                                                                                              | Genes up-regulated in circulating<br>endothelial cells (CEC) from cancer<br>patients compared to those from healthy<br>donors.  | up | 0 |
| M6905  | JAATINEN_HEMATOPOIETIC_STEM_CELL_<br>DN              | 498  | 83  | ISG20,ACTG2,CTGF,CH25H,FOXF1,CRTAM,C4A,SERPING1,SIRPA,PMP22,HLA-DRA,HLA-<br>DRB1,NFKBIE,RAC2,ZAP70,HLA-DRB5,HLA-DRB6,HLA-<br>DPB1,TCF4,CDC42EP3,CCDC80,RGS5,SERPINA3,PARVG,KIAA1949,LYZ,CPXM1,ARL4C,HLA-<br>DQB1,FHL1,GNG11,GLIPR2,MT1E,MT1H,MT1G,SELL,COL15A1,PDZRN3,MT1X,                                                                                                                                                                                                                                                                                                                                                                                                                                                                                                                                                                                                                                                                                                                                                                                                                                              | Genes down-regulated in CD133+<br>[GeneID=8842] cells (hematopoietic stem<br>cells)                                             | up | 0 |
| M14427 | DODD_NASOPHARYNGEAL_CARCINOMA_<br>DN                 | 2849 | 183 | ISG20,ACTG2,CTGF,CH25H,FOXF1,CRTAM,C4A,SERPING1,SIRPA,PMP22,HLA-DRA,HLA-<br>DRB1,NFKBIE,RAC2,ZAP70,HLA-DRB5,HLA-DRB6,HLA-<br>DPB1,TCF4,CDC42EP3,CCDC80,RGS5,SERPINA3,PARVG,KIAA1949,LYZ,CPXM1,ARL4C,HLA-<br>DQB1,FHL1,GNG11,GLIPR2,MT1E,MT1H,MT1G,SELL,COL15A1,PDZRN3,MT1X,                                                                                                                                                                                                                                                                                                                                                                                                                                                                                                                                                                                                                                                                                                                                                                                                                                              | Genes down-regulated in nasopharyngeal<br>carcinoma (NPC) compared to the normal<br>tissue.                                     | up | 0 |
| M10237 | RODRIGUES_THYROID_CARCINOMA_ANA<br>PLASTIC_UP        | 1487 | 94  | ISG20,ACTG2,CTGF,CH25H,FOXF1,CRTAM,C4A,SERPING1,SIRPA,PMP22,HLA-DRA,HLA-<br>DRB1,NFKBIE,RAC2,ZAP70,HLA-DRB5,HLA-DRB6,HLA-<br>DPB1,TCF4,CDC42EP3,CCDC80,RGS5,SERPINA3,PARVG,KIAA1949,LYZ,CPXM1,ARL4C,HLA-<br>DQB1,FHL1,GNG11,GLIPR2,MT1E,MT1H,MT1G,SELL,COL15A1,PDZRN3,MT1X,                                                                                                                                                                                                                                                                                                                                                                                                                                                                                                                                                                                                                                                                                                                                                                                                                                              | Genes up-regulated in anaplastic thyroid<br>carcinoma (ATC) compared to normal<br>thyroid tissue.                               | up | 0 |
| M3645  | DELYS_THYROID_CANCER_UP                              | 802  | 119 | ISG20,ACTG2,CTGF,CH25H,FOXF1,CRTAM,C4A,SERPING1,SIRPA,PMP22,HLA-DRA,HLA-<br>DRB1,NFKBIE,RAC2,ZAP70,HLA-DRB5,HLA-DRB6,HLA-<br>DPB1,TCF4,CDC42EP3,CCDC80,RGS5,SERPINA3,PARVG,KIAA1949,LYZ,CPXM1,ARL4C,HLA-<br>DQB1,FHL1,GNG11,GLIPR2,MT1E,MT1H,MT1G,SELL,COL15A1,PDZRN3,MT1X,                                                                                                                                                                                                                                                                                                                                                                                                                                                                                                                                                                                                                                                                                                                                                                                                                                              | Genes up-regulated in papillary thyroid<br>carcinoma (PTC) compared to normal<br>tissue.                                        | up | 0 |
| M4995  | LINDGREN_BLADDER_CANCER_CLUSTER<br>_2B               | 780  | 126 | ISG20,ACTG2,CTGF,CH25H,FOXF1,CRTAM,C4A,SERPING1,SIRPA,PMP22,HLA-DRA,HLA-<br>DRB1,NFKBIE,RAC2,ZAP70,HLA-DRB5,HLA-DRB6,HLA-<br>DPB1,TCF4,CDC42EP3,CCDC80,RGS5,SERPINA3,PARVG,KIAA1949,LYZ,CPXM1,ARL4C,HLA-<br>DQB1,FHL1,GNG11,GLIPR2,MT1E,MT1H,MT1G,SELL,COL15A1,PDZRN3,MT1X,                                                                                                                                                                                                                                                                                                                                                                                                                                                                                                                                                                                                                                                                                                                                                                                                                                              | Genes specifically up-regulated in Cluster<br>Ib of urothelial cell carcinom (UCC)<br>tumors.                                   | up | 0 |

|        |                                                     |      |     |                                                                                                                                                                                                                                                                 |                                                                                                                                                                                                       |    |   |
|--------|-----------------------------------------------------|------|-----|-----------------------------------------------------------------------------------------------------------------------------------------------------------------------------------------------------------------------------------------------------------------|-------------------------------------------------------------------------------------------------------------------------------------------------------------------------------------------------------|----|---|
| M15193 | GRUETZMANN_PANCREATIC_CANCER_UP                     | 694  | 86  | LDHA,PTGS2,PTGS1,CD53,ISG20,FOXF1,FAP,UGCG,WNK1,PMP22,HLA-DRA,ALDOC,AKAP12,IFI30,OAS1,SERPINH1,PLAT,MKI67,S100A11,S100A10,ABCG1,LAMA4,PLAU,NNMT,P4HA1,IL4R,SERPINA1,FCGR3A,TOP2A,CLIC1,RIN1,VCAN,RAP1GAP,DGKD,THBS2,TRIM29,BIRC3,STAT1,RAB31,YWHAH,PYGL,PGK1,HP | Genes up-regulated in pancreatic ductal adenocarcinoma (PDAC) identified in a meta analysis across four independent studies.                                                                          | up | 0 |
| M16066 | SPIELMAN_LYMPHOBLAST_EUROPEAN_VS_ASIAN_DN           | 1211 | 61  | ISG20,ZNF395,GATM,RAC2,UBE2L6,APOL1,MARCKS,PDI5,PEPD,ARL4C,RASSF2,SSR2,RBM3,SLC2A5,CECR1,NFE2L2,IL32,ARPC5,GPR27,STK19,TNFSF10,ST8SIA4,NBN,PIP5K1B,PRDX4,RHOB,GPNMB,RNASE6,PNOC,CD53,CD40,LILRB1,LPAR6,OAS2,KLF6,SMAD2,SLAMF7,CD63,SLAMF1,ABCG1,RIT1,ADM,CLEC2  | Genes down-regulated in lymphoblastoid cells from the European population compared to those from the Asian population.                                                                                | up | 0 |
| M9585  | PUJANA_ATM_PCC_NETWORK                              | 3057 | 181 | KLRC4,LDHB,LDHA,BTK,B2M,SCN2B,OLFML2B,ZWINT,HLA-DRA,RAC2,HLA-DOA,ATP11A,SIRPB1,LYN,ARHGEF18,WAS,PLXDC1,GRIP2,PDK1,TGFB1,CDKN2C,CCL3,ARPC5,CSF2RA,ICOS,ARHGDI1,MUC1,PVT1,FSCN2,P2RX7,SLC1A4,IFI16,CA7,GPSM3,GRAMD4,SCNN1B,HMGN3,CD52,CD53,CD3G,EMX1,IFI44,CD40,B | Genes constituting the ATM-PCC network of transcripts whose expression positively correlated (Pearson correlation coefficient                                                                         | up | 0 |
| M10351 | BUYTAERT_PHOTODYNAMIC_THERAPY_STRESS_DN             | 1337 | 92  | KIFC1,MALL,ISG15,CTGF,HLA-DPA1,PPP1R3C,RAC2,CDC42EP3,MKI67,APOL1,PCDHGA10,INHBB,CCND1,VCAN,TRIM14,HK2,MTCP1NB,RNASET2,BUB1,PCSK6,TBC1D2,SHMT1,MPZL2,CTDSPL,CDKN2C,ST3GAL4,TGFB1,HADH,NEIL3,ENC1,SIX1,NGF,TUBB,MEIS2,ARHGDI1,GINS2,PLK2,LOXL1,SLC43A3,ALDH1B1,NR | Genes down-regulated in T24 (bladder cancer) cells in response to the photodynamic therapy (PDT) stress.                                                                                              | up | 0 |
| M12527 | RICKMAN_TUMOR_DIFFERENTIATED_WELL_VS_POORLY_DN      | 775  | 47  | LDHA,ADCY7,PTGS1,LTB4R,ERAP2,S100A2,CD36,PRDM1,GNAI1,AFAP1L1,PVRL4,AHNAK2,SLC31A2,KLF6,CPEB4,CDSN,KCNK10,LOC154761,ALS2CL,ADM,SERPINB1,ARL4D,GPM6B,EPK1,FEM1C,RAB31,SLC7A5,MMP1,SLC2A1,CA12,TMSB10,ANKRD13A,PTHLH,HIF1A,ERO1L,CDKN1A,YIPF5,CASP4,SQRDL,EGLN3,E  | Down-regulated genes that vary between HNSCC (head and neck squamous cell carcinoma) groups formed on the basis of their level of pathological differentiation: well vs poorly differentiated tumors. | up | 0 |
| M12369 | RICKMAN_METASTASIS_DN                               | 548  | 69  | PTGS2,ADCY7,PGAM1,PDLIM1,MEGF11,ATP2B4,MALL,S1PR5,S100A2,BCR,KIAA1522,PITPNM3,TAGLN2,PVRL4,CD68,ZAP70,FCER1G,AHNAK2,NDUFA4L2,S100A11,SEMA3F,LOC154761,ALS2CL,PRIC285,PRF1,PHLDA3,TBC1D2,EPPK1,TRIM29,RASSF5,PROM2,RNF19B,BCR,MPZL2,MOBK2A,NLRC5,SLC2A1,LAD1,GN  | Genes down-regulated in metastatic vs non-metastatic HNSCC (head and neck squamous cell carcinoma) samples.                                                                                           | up | 0 |
| M19826 | ZHANG_RESPONSE_TO_IKK_INHIBITOR_AND_TNF_UP          | 443  | 62  | EFNA1,EDN1,ISG20,LPAR6,NFKBIE,LIF,KLF6,OASL,ETS1,PLAU,MARCKSL1,CHST15,ICAM1,LYN,MMP13,SERPINB9,TNFRSF10B,ANKRD22,G0S2,PRIC285,ABTB2,PML,CCL20,DAPP1,SPSB1,BIRC3,SOD2,RNF19B,DRAM1,OCLN,TLR2,CXCL11,CXCL10,MFHAS1,IL1B,ELOVL7,SAMD4A,SOCS3,RELB,DDIT4,TRIM38,TNF | Genes up-regulated in BxPC3 cells (pancreatic cancer) after treatment with TNF [GeneID=7124] or IKI-1                                                                                                 | up | 0 |
| M13867 | ONDER_CDH1_TARGETS_2_UP                             | 522  | 60  | CADM3,PNMA2,CTGF,STC2,TRPA1,GRB10,TFPI,PMP22,CYP1B1,ENPP2,PPP1R3C,SYNE1,ATP6V0E2,TGFBR3,MARCKS,NNMT,NRP1,FERMT2,KCNMA1,VCAN,COL3A1,GNG11,WIPF1,PTGFR,FBLN1,NUPR1,DUSP1,FBLN5,AOX1,CDKN2C,LOX,ALDH6A1,MOXD1,TNFAIP6,COL1A2,COL1A1,SLITRK5,RHOBTB3,FN1,PODXL,CYFI | Genes up-regulated in HMLE cells (immortalized nontransformed mammary epithelium) after E-cadherin (CDH1) [GeneID=999] knockdown by RNAi.                                                             | up | 0 |
| M15484 | ONDER_CDH1_SIGNALING_VIA_CTNNB1                     | 173  | 29  | CADM3,MLPH,EFNA1,FERMT2,PRRX1,KCNMA1,ICAM1,STC2,COL1A2,VCAN,TNFAIP3,ERMP1,IFIH1,C3,SAA2,EPB41L4B,SOX9,TPM1,PPL,NDRG1,SCNN1A,PODXL,MAP1B,FZD3,BIRC3,NUPR1,FBLN5,AOX1,IGFBP3                                                                                      | Genes changed in HMLE cells (mmortalized nontransformed mammary epithelium) after RNAi knockdown of both CDH1 and CTNNB1 [GeneID=999;1499]                                                            | up | 0 |
| M19467 | SANA_TNF_SIGNALING_DN                               | 168  | 20  | CTGF,TPT1,APLN,CDCA7L,EMCN,CLU,TGM2,AHNAK2,MYOF,PHLDA1,ARHGDI1,GIMAP7,DHRS11,ANXA1,NTN4,SMYD2,KDR,VWF,FAM198B,PECAM1                                                                                                                                            | Genes down-regulated in five primary endothelial cell types (lung                                                                                                                                     | up | 0 |
| M19695 | FLECHNER_BIOPSY_KIDNEY_TRANSPLANT_REJECTED_VS_OK_UP | 181  | 50  | CD8A,CD52,CD53,ISG20,SLA,CXCR4,IL4R,FCGR3A,CD3D,GZMA,MOXD1,CD163,HLA-F,C1QB,LILRB4,LCK,UBC,CSTA,VSIG4,GBP2,LST1,ALDOC,APOC1,IFI30,ITGB2,CCL5,RGS10,TNFRSF1B,TYMP,LAPTM5,RAC2,IL10RB,IL10RA,FCGR1A,CD2,FCER1G,INPP5D,GAPDH,TYROBP,PTPRC,HCLS1,UBE2L6,STAT1,PSMB8 | Genes up-regulated in kidney biopsies from patients with acute transplant rejection compared to the biopsies from patients with well functioning kidneys more than 1-year post transplant.            | up | 0 |

|        |                                      |      |     |                                                                                                                                                                                                                                                                      |                                                                                                                                                                             |    |   |
|--------|--------------------------------------|------|-----|----------------------------------------------------------------------------------------------------------------------------------------------------------------------------------------------------------------------------------------------------------------------|-----------------------------------------------------------------------------------------------------------------------------------------------------------------------------|----|---|
| M11620 | WIELAND_UP_BY_HBV_INFECTION          | 240  | 65  | HLA-DMA,HLA-DMB,RARRES3,HLA-DRB1,PTTG1,CD53,CXCL11,CXCL10,ISG20,B2M,TAPBP,CD3D,HLA-A,CECR1,HLA-C,HLA-B,HLA-E,HLA-F,C1QB,HLA-DPA1,VSIG4,GBP2,GBP1,HLA-DRA,C3AR1,IFI30,CCL5,CD74,CD68,LAPTM5,RAC2,FCER1G,HLA-DPB1,ARHGDIB,TYROBP,LGALS3,UBE2L6,S100A10,TARP,PSMB9      | Genes induced in the liver during hepatitis B (HBV) viral clearance in chimpanzees.                                                                                         | up | 0 |
| M13453 | DER_IFN_BETA_RESPONSE_UP             | 166  | 26  | PMAIP1,ISG15,HADH,PDXK,BST2,HLA-A,HLA-C,IFI16,HLA-E,HIF1A,GBP1,NMI,PML,TRIM14,OAS1,OAS2,IFI35,TAP1,PHLDA1,MAP1B,ARID3A,STAT1,TRIM21,IFIT3,ETS2,IRF1                                                                                                                  | Genes up-regulated in HT1080 (fibrosarcoma) cells by treatment with interferon beta for 6 h.                                                                                | up | 0 |
| M9826  | VANTVEER_BREAST_CANCER_METASTASIS_DN | 216  | 26  | SLC2A3,ASPM,PRAME,DEPDC1,VEGFA,CTSL2,ESM1,PAQR3,TK1,LPCAT1,NDRG1,GGH,PLEKHA1,BNIP3,PFKP,NUSAP1,CA9,ADM,DEGS1,NMB,HJURP,BUB1,FLT1,SMC4,CP,PGK1                                                                                                                        | Genes whose expression is significantly and negatively correlated with poor breast cancer clinical outcome (defined as developing distant metastases in less than 5 years). | up | 0 |
| M4551  | SANA_RESPONSE_TO_IFNG_UP             | 138  | 43  | RARRES3,IFI44L,CXCL11,RNF213,HLA-DMA,CXCL10,NLRC5,PLA1A,CASP1,CEACAM1,BST2,DTX3L,HLA-A,SERPING1,HLA-C,HLA-B,HLA-E,HLA-DQA1,PARP14,UBD,HLA-DPA1,GBP3,GBP1,HLA-DQB1,IFIH1,HLA-DRB1,CXCL9,OAS1,OAS2,SAMD9L,IFI35,HLA-DRB5,GIMAP7,SAMHD1,UBE2L6,IDO1,LGALS9,APOL2,A      | Genes up-regulated in five primary endothelial cell types (lung)                                                                                                            | up | 0 |
| M17466 | SANA_TNF_SIGNALING_UP                | 152  | 34  | TLR2,IFI44L,CXCL11,TAPBP,CXCL10,CXCR7,RHOB,PLA1A,CASP1,TNIP1,ICAM1,BST2,HLA-A,HLA-C,HLA-B,PARP14,UBD,TNFAIP3,TNFAIP2,GBP1,IFIH1,OAS1,IL32,OAS2,SAMD9L,VCAM1,CCL20,SAMHD1,BIRC3,LGALS9,APOL3,APOL1,SLC15A3,DRAM1                                                      | Genes up-regulated in five primary endothelial cell types (lung)                                                                                                            | up | 0 |
| M3069  | LENAOUR_DENDRITIC_CELL_MATURATION_DN | 202  | 26  | TLR1,ISG15,CCR2,C3AR1,ITGAL,LST1,FCER1G,SREBF2,CORO1A,NAMPT,CYTIP,MARCKSL1,SLC1A3,SERPINA1,LYZ,CD163,BTG2,C3,NMB,TNFRSF1B,CLEC2B,IL2RG,CD180,SOD2,CYBB,CD14                                                                                                          | Genes down-regulated during in vitro maturation of CD14+ [GeneID=929] monocytes (day 0) into immature (day 7) and mature dendritic cells (day 14).                          | up | 0 |
| M4861  | VERHAAK_AML_WITH_NPM1_MUTATED_UP     | 416  | 75  | SCPEP1,HIST1H2AD,AQP9,TLR4,CXCL10,KCNK5,RNASE2,LILRA6,IL1B,FCGR3A,FCGR3B,VN,N2,FBP1,LILRB1,C1QA,C1QB,LILRB2,CD36,LILRB3,CX3CR1,TNFAIP3,FAM38B,TNFAIP2,MVP,PHA2,C3AR1,CYP1B1,CLU,IFI30,KCNJ2,CCL4,HOXA6,HOXA7,HOXA9,DEFB1,LAPTM4B,CD300C,HOXB3,TNFSF10,CCL3,CCL3      | Genes up-regulated in acute myeloid leukemia (AML) patients with mutated NPM1 [GeneID=4869] .                                                                               | up | 0 |
| M8493  | BASSO_CD40_SIGNALING_UP              | 222  | 36  | HLA-DRB1,BATF,IL1B,NCF2,CD40,HLA-DQA1,HLA-F,DDIT4,TCFL5,TNFAIP3,TNFAIP2,CCL3,NFKBIE,IFI30,CCL4,CD74,LAPTM5,RAC2,HLA-DPB1,LGALS1,NCKAP1L,SLAMF1,RGS1,HLA-DMA,ICAM1,LYN,HLA-DQB1,BCL2,TAP1,SH2B3,CR2,PTPRE,PLEK,TNFSF9,STAT1,HSP90B1                                   | Gene up-regulated by CD40 [GeneID=958] signaling in Ramos cells (EBV negative Burkitt lymphoma).                                                                            | up | 0 |
| M19541 | REN_ALVEOLAR_RHABDOMYOSARCOMA_DN     | 826  | 73  | OSMR,FSTL3,FSTL1,SERPINE2,CTGF,FAP,PEA15,P4HA1,CLIC1,MMP14,CCND1,VCAN,ARL4C,AXL,QPCT,LRP1,DUSP1,TGFB1,TGFB1,EGFR,FNDC3B,EGFR,PDXX,COL1A1,NGF,TNFRSF12A,ARPC5,TIMP1,VDR,PRDX4,CASP4,LOXL1,VAT1,ANXA1,ANXA5,COL5A2,SCPEP1,SFXN3,TAGLN2,IDH1,PLAT,KLF6,OSBPL3,S100A10,L | Genes commonly down-regulated in human alveolar rhabdomyosarcoma (ARMS) and its mouse model overexpressing PAX3-FOXO1 [GeneID=5077;2308] fusion.                            | up | 0 |
| M8144  | KRIGE_RESPONSE_TO_TOSEDOSTAT_6HR_UP  | 1958 | 125 | SIPA1L2,DUSP10,UBE2L6,ERRF1,LYZ,SERPINB1,KSR1,PHLDA1,SLFN13,PSAT1,AKNA,HLA-J,HLA-A,HLA-E,HLA-G,HLA-F,VAMP4,TTYH3,PVT1,MYO1G,CDKN1A,E2F7,PREX1,SLC1A4,SPRY1,DDDB2,GPSM3,CYBB,ERAP1,GPT2,APOLD1,WNK1,CD40,VEGFA,IDH1,TYROBP,CHI3L1,ETS1,RIT1,NRP1,CPEB2,CPEB4,AGP      | Genes up-regulated in HL-60 cells (acute promyelocytic leukemia)                                                                                                            | up | 0 |
| M17915 | KRIGE_RESPONSE_TO_TOSEDOSTAT_24HR_UP | 1617 | 120 | SIPA1L2,DUSP10,UBE2L6,ERRF1,SERPINB1,KSR1,PHLDA1,SLFN13,PSAT1,AKNA,HLA-J,HLA-A,HLA-E,HLA-G,HLA-F,VAMP4,TTYH3,MYO1G,CDKN1A,E2F7,PREX1,SLC1A4,IFI16,DDDB2,GPSM3,EHBP1L1,CYBB,ERAP1,GPT2,WNK1,APOLD1,CD40,VEGFA,BIN2,IDH1,TYROBP,CHI3L1,ETS1,RIT1,NRP1,CPEB2,CPEB4      | Genes up-regulated in HL-60 cells (acute promyelocytic leukemia)                                                                                                            | up | 0 |

|        |                                       |      |     |                                                                                                                                                                                                                                                                 |                                                                                                                                         |    |   |
|--------|---------------------------------------|------|-----|-----------------------------------------------------------------------------------------------------------------------------------------------------------------------------------------------------------------------------------------------------------------|-----------------------------------------------------------------------------------------------------------------------------------------|----|---|
| M17363 | KIM_LRRC3B_TARGETS                    | 62   | 20  | HLA-DQB1,HLA-DRB1,CXCL9,OAS2,CCL5,CD74,B2M,TAPBP,ISG15,TAP1,SERPINA1,HLA-DPB1,HLA-A,LYZ,HLA-C,IFI44,IFI16,HLA-B,HLA-E,IFI27                                                                                                                                     | Immune response genes up-regulated in xenograft tumors formed by SNU-601 cells (gastric cancer) made to express LRRC3B [GeneID=116135]. | up | 0 |
| M3961  | KYNG_DNA_DAMAGE_UP                    | 202  | 35  | CRHBP,CD53,SERPINE2,CTGF,LOX,CRYAB,HLA-DQA1,HSPB8,EPS8L1,NGF,GBP1,ITGAL,AKAP12,NDRG1,RPL7A,FN1,NNMT,NRP2,PRDX4,CSF2RB,RHOB,SEMA3B,IFNGR2,CCND1,TNFRSF10B,LCK,VIM,COL3A1,FMO4,IL10RB,MT1H,ANXA1,PCK2,ID1,IGFBP3                                                  | Genes with GO annotation and up-regulated after DNA damage in cell lines from young donors.                                             | up | 0 |
| M10319 | WALLACE_PROSTATE_CANCER_RACE_UP       | 728  | 132 | ADCY7,CD52,CD53,DNASE1L3,ISG20,ISG15,ERAP1,PDHA1,HCG26,CD3D,APOLD1,OLFML2A,IFI44,PPARGC1A,HLA-DQA1,C1QA,C1QB,LILRB2,BTN3A1,CCR5,VSIG4,BTN3A2,HLA-DRA,OAS2,RAC2,ZAP70,FCER1G,AHNAK2,HLA-DPB1,UBE2L6,NCKAP1L,SLAMF1,IFI27,APOL1,RGS1,HMGCS2,ETS2,EDNRA,HLA-DQB1,G | Genes up-regulated in prostate cancer samples from African-American patients compared to those from the European-American patients.     | up | 0 |
| M15709 | ACEVEDO_LIVER_CANCER_UP               | 1948 | 126 | B2M,PGAM4,HLA-DRA,SERPINH1,RAC2,GGH,RGS1,RGS5,LYZ,SERPINB1,SORT1,FOXC1,PHLDA3,CXCL10,FD3B,HLA-C,HLA-B,HLA-E,HLA-F,TCFL5,NFE2L2,FAM38B,IL32,ARPC5,CCL5,ABCB1,PTTG1IP,SLC1A3,UQCRH,UBD,FKBP5,TMED7,CD2,FRZB,APOLD1,IFI44,PRKCDBP,BTN3A2,CHKA,CD74,TK1,IFI27,ETS   | Genes up-regulated in hepatocellular carcinoma (HCC) compared to normal liver samples.                                                  | up | 0 |
| M2700  | SMID_BREAST_CANCER_RELAPSE_IN_BONE_DN | 787  | 91  | LDHB,PTGS2,FBXO17,SARS2,EDN1,AQP5,CD52,L1CAM,GLDC,ACTG2,MALL,SOSTDC1,KCNK5,S100A1,S100A2,PRAME,CRYAB,PRELP,VEGFA,VGLL1,TFCP2L1,IGF2BP2,TAGLN2,RAC2,HLA-DOB,KLF6,NDUFA4L2,SFRP1,ELF5,FERMT1,ART3,TNFRSF11B,SCRG1,CEACAM1,MMP14,FOXC1,ARL4C,HLA-DQB2,GPM6B,ITM2C, | Genes down-regulated in bone relapse of breast cancer.                                                                                  | up | 0 |
| M17572 | SMID_BREAST_CANCER_LUMINAL_B_DN       | 1353 | 199 | LDHB,PTGS2,L1CAM,ISG20,ACTG2,MALL,SERPINE2,CTGF,PPP1R1A,CH25H,KCNK5,VNN2,CRYAB,SERPING1,VGLL1,TFPI,GRB14,HLA-DRA,EMCN,CYP1B1,SERPINH1,RAC2,ZAP70,HLA-DOB,ELF5,SCRG1,LYN,MICAL3,LYZ,MMP14,MYCN,VCAN,FOXC1,IGF2,INS-IGF2,ARL4C,HLA-DQB1,C7,HSD17B2,C3,FHL1,PML,IT | Genes down-regulated in the luminal B subtype of breast cancer.                                                                         | up | 0 |
| M8513  | SMID_BREAST_CANCER_NORMAL_LIKE_UP     | 1087 | 153 | LDHB,ISG20,BTK,MALL,CH25H,GIT2,VNN2,CRYAB,SERPING1,TFPI,HLA-DPA1,HLA-DRA,EMCN,CYP1B1,RAC2,ZAP70,TCF4,HLA-DOB,SYNE1,RGS5,TGFBR3,LZTS1,ANGPT2,FMNL1,ABCB1,LYN,LYZ,ARL4C,HLA-DQB1,C7,C3,FHL1,GNG11,ITM2C,SORBS1,CCL21,WIPF1,ZBP1,FLRT2,MT1M,SELL,LILRA6,LILRB3,SEL | Genes up-regulated in the normal-like subtype of breast cancer.                                                                         | up | 0 |
| M8124  | SMID_BREAST_CANCER_BASAL_UP           | 1486 | 177 | KIFC1,LDHB,PTGS2,L1CAM,ISG20,ACTG2,MALL,CTGF,KCNK5,CRYAB,VGLL1,RTP4,SERPINH1,HIST1H2BK,MKI67,NDUFA4L2,GGH,ATP11A,FGF9,ELF5,SCRG1,MYC,CEACAM1,LYN,MMP14,MMP12,FOXC1,ARL4C,PML,ITM2C,CCL20,BUB1,SIM1,PHLDA1,PKD1,HAPLN1,TRIM29,MT1X,CCL18,QPCT,CP,PSAT1,DUSP9,MPZ | Genes up-regulated in basal subtype of breast cancer samles.                                                                            | up | 0 |
| M9946  | LU_TUMOR_ANGIOGENESIS_UP              | 52   | 9   | EDN1,TYMP,HEY1,CXCR4,TNFAIP6,CCND2,VEGFA,STC1,VCAN                                                                                                                                                                                                              | Up-regulated genes of putative pathways stimulated in tumor endothelial cells by papillary serous ovarian epithelial tumor cells.       | up | 0 |
| M12636 | RUTELLA_RESPONSE_TO_CSF2RB_AND_IL4_UP | 691  | 60  | IL6ST,APOO,CYP1B1,LMBN1,SCD,CHI3L1,GGH,SLAMF7,CSRP1,CD63,SLAMF1,ABCG1,SYNGR3,QPRT,MARCKS,NRP1,MARCKSL1,KCNMA1,BATF3,CYB5A,MMP12,ANXA2P2,CCND1,CXCL9,CYP27B1,DAPP1,TBC1D4,BIRC3,PHYH,CCL18,IL10,TBC1D13,TNFAIP6,LRKK1,NETO2,APOC1,ST8SIA1,VDR,NDRG1,ARL6IP5,RUNX | Genes up-regulated in peripheral blood monocytes by CSF2RB (GM-CSF) and IL4 [GeneID=1437;3565].                                         | up | 0 |
| M8582  | RUTELLA_RESPONSE_TO_CSF2RB_AND_IL4_DN | 674  | 85  | RARRES3,AQP9,CD52,LTB4R,ZNF395,CRTAM,HLA-DQA1,C1QA,LILRB2,CCR5,CX3CR1,LILRB4,VSIG4,CLEC5A,CD68,LGALS3,ACPP,CD300A,ETS2,PDIA5,CHST15,BHLHE41,ARHGEF6,SIGIRR,CD163,PTGDS,PLA2G7,VCAN,C3,HK2,PLIN2,RNASET2,MT1H,MT1G,MT1F,BTN3A2,BTN3A3,SELL,STAT1,PCK2,MT1X,SOD2, | Genes down-regulated in peripheral blood monocytes by CSF2RB (GM-CSF) and IL4 [GeneID=1437;3565].                                       | up | 0 |

|        |                                               |     |     |                                                                                                                                                                                                                                                                 |                                                                                                                                                          |    |   |
|--------|-----------------------------------------------|-----|-----|-----------------------------------------------------------------------------------------------------------------------------------------------------------------------------------------------------------------------------------------------------------------|----------------------------------------------------------------------------------------------------------------------------------------------------------|----|---|
| M18149 | RUTELLA_RESPONSE_TO_HGF_UP                    | 874 | 98  | CRTAM,CYP1B1,GGH,SYNGR3,MARCKS,BHLHE41,MMP12,ANXA2P2,CCND1,C3,HK2,TBC1D4,MT1H,MT1G,MT1F,PCK2,PHYH,MT1X,CCL18,IL10,CXCL10,MFHAS1,IL1B,PDXK,FBP1,TNFAIP6,NETO2,C3AR1,APOC1,ST8SIA1,VDR,ADAM28,NGK7,CCR2,SLC1A4,SLC1A3,CSF2RA,SLC43A3,VAT1,FCGR1A,FCGR1C,SNX10,GP  | Genes up-regulated in peripheral blood monocytes by HGF [GeneID=3082] .                                                                                  | up | 0 |
| M6413  | RUTELLA_RESPONSE_TO_HGF_DN                    | 491 | 47  | RARRES3,CD52,LTB4R,ZNF395,HLA-DQA1,LILRB2,CX3CR1,LMNB1,ACPP,CD300A,ETS2,QPRT,MARCKSL1,PDIA5,BATF3,ARHGFE6,CD163,SIGIRR,VCAN,DAPP1,PLIN2,RNASET2,SELL,SLC16A5,CD14,SLC2A3,HLA-E,DDIT4,LRRK1,ITGAL,MCL1,RUNX3,ITGA4,CDKN1C,CDKN1A,NAMPT,SLC2A3,CXCR4,CASP1,NLRP3, | Genes down-regulated in peripheral blood monocytes by HGF [GeneID=3082] .                                                                                | up | 0 |
| M19971 | RUTELLA_RESPONSE_TO_HGF_VS_CSF2_RB_AND_IL4_UP | 858 | 102 | ZNF395,CRTAM,HLA-DQA1,CYP1B1,GGH,ACPP,CD300A,PDIA5,BHLHE41,CCND1,C3,HK2,RNASET2,MT1H,MT1G,MT1F,SELL,PCK2,MT1X,CCL18,IL10,CXCL10,MFHAS1,SLC2A3,IL1B,PDXK,FBP1,HLA-E,DDIT4,TNFAIP6,C3AR1,APOC1,ADAM28,CDKN1C,NGK7,CCR2,SLC1A4,SLC1A3,CASP1,SLC43A3,VAT1,FCGR1A,F  | Genes up-regulated in peripheral blood mononucleocytes by HGF [GeneID=3082] compared to those regulated by CSF2RB (GM-CSF) and IL4 [GeneID=1437;3565].   | up | 0 |
| M13333 | RUTELLA_RESPONSE_TO_HGF_VS_CSF2_RB_AND_IL4_DN | 507 | 43  | IL6ST,LTB4R,LMNB1,CSRP1,SLAMF1,SYNGR3,ABCG1,MARCKS,QPRT,MARCKSL1,BATF3,ARHGFE6,CYB5A,MMP12,ANXA2P2,VCAN,DAPP1,TBC1D4,BIRC3,PHYH,SLC16A5,TBC1D13,LRRK1,NETO2,MCL1,ST8SIA1,VDR,ARL6IP5,RUNX3,ITGA4,CDKN1A,IL21R,CXCR4,RAMP1,TUBA1C,CSF2RA,CD84,GABBR1,UBD,EGLN3,M | Genes down-regulated in peripheral blood mononucleocytes by HGF [GeneID=3082] compared to those regulated by CSF2RB (GM-CSF) and IL4 [GeneID=1437;3565]. | up | 0 |
| M8520  | SHEDDEN_LUNG_CANCER_POOR_SURVIVAL_A6          | 938 | 75  | LDHB,SPAG5,ZWINT,ESM1,MKI67,GGH,ANGPT2,MMP12,ARL4D,HK2,BUB1,CCNB1,DUSP9,PAT1,SLC7A5,EIF4EBP1,CDKN2A,CDKN2C,SLC2A1,ASPM,NEIL3,NETO2,GINS2,GPR37,KIF23,NBN,E2F8,PAX8,NUSAP1,EGLN3,PTTG1,PITX1,STC2,DEPDC1,VEGFA,STC1,CTSL2,LMNB1,NEK2,CD70,TK1,SCD,RAD54L,TOP2A,  | Cluster 6 of method A: up-regulation of these genes in patients with non-small cell lung cancer (NSCLC) predicts poor survival outcome.                  | up | 0 |
| M11197 | HSIAO_HOUSEKEEPING_GENES                      | 851 | 71  | RPL17,LDHB,LDHA,PGAM1,ISG20,B2M,RPLP0,RPL12,RPS19,RPS14,HLA-DPA1,HLA-DRA,HLA-DOA,RPS8,UBA1,MARCKS,SERPINA3,CLIC1,RPL41,CCND2,HLA-DQB1,FHL1,RPL35,RPL39,DUSP1,SSR2,HLA-A,TMSB10,HLA-E,TUBB,RPL7A,ARHGDI1,CYB5R3,HINT1,RPS2,UQCRH,HLA-A,HLA-B,UBC,ABLIM1,VIM,PLP2 | Housekeeping genes identified as expressed across 19 normal tissues.                                                                                     | up | 0 |
| M215   | LIU_VAV3_PROSTATE_CARCINOGENESIS_UP           | 180 | 38  | TLR2,APOD,CDKN2C,SERPINA3,CASP1,PITX2,CTSS,C1QA,CD36,CCND2,LILRB3,PLA2G7,SERPINB1,GBP2,C3,TNC,ITGB2,CD74,TAP1,TGM2,SFTPD,FCER1G,GNMB,ARHGDI1,SIM2,FN1,TYROBP,PLAT,LGALS3,KLK3,STAT1,PSMB8,PSMB9,IFIT3,CYBB,TNFSF10,FBLN1,IRF1                                   | Selected genes up-regulated in prostate tumors developed by transgenic mice overexpressing VAV3 [GeneID=10451] in prostate epithelium.                   | up | 0 |
| M8467  | JISON_SICKLE_CELL_DISEASE_UP                  | 384 | 54  | ATP1B1,CXCL10,HIST1H2BK,SLC2A3,SMOX,H1F0,BST2,HLA-A,CHP2,IFI44,SERPING1,CCR2,VSIG4,GBP2,GBP1,LMNB1,NFKBIE,IFI30,IFI35,TIMP1,FN1,P4HB,TP53I11,UBE2L6,PSMB8,PSMB9,OASL,CDKN1A,RIT1,HTATIP2,PRDX4,CCR2,HMOX1,CLIC1,ADM,NGFR,HLA-DQB1,ABLIM3,RSAD2,GNG11,TPM1,TYMP  | Genes up-regulated in peripheral blood mononuclear cells (PBMC) from sickle cell disease patients compared to those from healthy subjects.               | up | 0 |
| M5369  | POOLA_INVASIVE_BREAST_CANCER_UP               | 701 | 116 | ADCY7,CD52,PTTG1,CD53,BTK,ISG20,FAP,CH25H,NCF2,CD3D,CD40,HLA-DQA1,LILRB1,LILRB2,LILRB4,NEK2,IFI30,CD74,TK1,CD68,FCER1G,HLA-DRB6,IKZF1,LGALS9,CLEC7A,TOP2A,FCGR3B,GZMA,LYZ,GZMB,MMP13,MMP12,CD163,GZMK,PLA2G7,VCAN,FKBP11,GPR65,CXCL9,FPR3,FCGR1B,PLEK,EPPK1,SEL | Genes up-regulated in atypical ductal hyperplastic tissues from patients with (ADHC) breast cancer vs those without the cancer (ADH).                    | up | 0 |
| M12602 | WOO_LIVER_CANCER_RECURRENCE_UP                | 215 | 33  | TGFB1,CTGF,LOX,CRYAB,TMSB10,TACSTD2,COL1A2,COL1A1,PMP22,FGFR2,ALDOA,ENPP2,SOX9,LPCAT1,SEMA6A,LAMA4,RGS1,MARCKS,PLAU,BHLHE41,PFKP,CCND2,PKM2,TREM2,SGCB,HK2,RGS10,COL9A2,BCL2,ENO2,CD24,DPYSL2,IGFBP3                                                            | Genes positively correlated with recurrence free survival in patients with hepatitis B-related (HBV) hepatocellular carcinoma (HCC).                     | up | 0 |

|        |                                             |     |     |                                                                                                                                                                                                                                                                                                            |                                                                                                                                                                  |    |   |
|--------|---------------------------------------------|-----|-----|------------------------------------------------------------------------------------------------------------------------------------------------------------------------------------------------------------------------------------------------------------------------------------------------------------|------------------------------------------------------------------------------------------------------------------------------------------------------------------|----|---|
| M5311  | HOSHIDA_LIVER_CANCER_SUBCLASS_S1            | 476 | 73  | LDHB, CD53, CTGF, CD3D, HLA-DQA2, C1QB, ALDOA, CYP1B1, IFI30, CD74, PEA15, HLA-DPB1, TCF4, HLA-DOA, LAMB1, LGALS1, S100A11, S100A10, SMAD2, LGALS9, RIT1, FCGBP, LYN, CCND2, VCAN, HLA-DQB1, COL3A1, HCLS1, COL15A1, LSP1, RAB31, FCGR2A, PGK1, CRABP2, PKMYT1, SLC7A5, PNP, SLC2A5, SLC2A1, IL15RA, LO    | Genes from 'subtype S1' signature of hepatocellular carcinoma (HCC): aberrant activation of the WNT signaling pathway.                                           | up | 0 |
| M17951 | NAKAYAMA_SOFT_TISSUE_TUMORS_PCA1_UP         | 221 | 50  | IFI44L, CD52, CXCL10, ISG20, SLA, IL4R, FAP, SERPINA1, FCGR3A, FCGR3B, HLA-DQB1, HLA-DQA1, GZMA, LYZ, CD163, C1QA, LILRB1, TNFAIP6, C1QB, SIGLEC1, GZMK, FCGR1A, FCGR1C, HLA-DPA1, VSIG4, BIN2, HLA-DRA, GABBR1, UBD, HLA-DQB1, C3, LUM, CXCL9, IFI30, DCN, CCL5, TIMP1, HSPA6, GPNMB, THBS2, MS4A4A, NC   | Top 100 probe sets contributing to the positive side of the 1st principal component; predominantly associated with spindle cell and pleomorphic sarcoma samples. | up | 0 |
| M9893  | RODWELL_AGING_KIDNEY_NO_BLOOD_UP            | 339 | 53  | OCLN, VTCN1, SERPINE2, RPL12, TPSB2, SPARCL1, SERPING1, CDO1, MOXD1, C1QA, C1QB, VSNL1, COL1A2, TFPI, COL1A1, SERPINH1, TIMP1, FN1, P4HB, MCAM, RAD54L, RGS1, PLK2, NNMT, MSR1, TNFRSF11B, SLC1A3, C4A, BHLHE41, LOXL1, AMBP, DEGS1, GABBR1, UBD, C7, C3, LUM, FHL1, TNC, COL3A1, RPL35, TPM1, ITM2C, VCAM | Genes whose expression increases with age in normal kidney                                                                                                       | up | 0 |
| M5389  | RODWELL_AGING_KIDNEY_UP                     | 807 | 139 | HLA-DMA, HLA-DMB, RARRES3, VTCN1, CD53, MALL, SERPINE2, RPL10, RPL12, TPSB2, SERPING1, VASH1, MGA T1, C1QA, C1QB, RPS19, CX3CR1, TFPI, HLA-DPA1, HLA-DRA, TAGLN2, LPCAT1, RAC2, FCER1G, HLA-DRB6, TYROBP, IKZF1, MCAM, RAD54L, RGS1, CLEC7A, NNMT, HTATIP2, MSR1, TNFRSF11B, CHST15, BHLHE41, HLA-DQB      | Genes whose expression increases with age in normal kidney.                                                                                                      | up | 0 |
| M1278  | MCLACHLAN_DENTAL_CARIES_DN                  | 610 | 119 | HLA-DMA, HLA-DMB, PTGS2, CD53, AQP3, SERPINE2, NCF2, KIF5C, HLA-DQA1, C1QB, CCR2, HLA-DPA1, HLA-DRA, XIST, SAA2, IFI30, CD74, RAC2, FCER1G, HLA-DRB6, HLA-DPB1, BLNK, CHI3L1, RAB7L1, CLEC7A, SASH3, PLAU, MSR1, SERPINA3, SERPINA1, HLA-DQB1, FCGR3B, ICAM1, LYN, LYZ, GZMB, ADM, PLA2G7, G0S2, FKBP1     | Genes down-regulated in pulpal tissue extracted from carious teeth.                                                                                              | up | 0 |
| M10454 | MCLACHLAN_DENTAL_CARIES_UP                  | 554 | 111 | HLA-DMA, HLA-DMB, PTGS2, CD53, AQP3, SERPINE2, NCF2, HLA-DQA1, C1QB, CCR2, HLA-DPA1, HLA-DRA, SAA2, IFI30, CD74, RAC2, FCER1G, HLA-DRB6, HLA-DPB1, BLNK, CHI3L1, RAB7L1, CLEC7A, PLAU, SASH3, MSR1, SERPINA3, SERPINA1, HLA-DQB1, FCGR3B, ICAM1, LYN, LYZ, GZMB, ADM, PLA2G7, G0S2, FKBP11, CHL1, HLA-     | Genes up-regulated in pulpal tissue extracted from carious teeth.                                                                                                | up | 0 |
| M12299 | SEMENZA_HIF1_TARGETS                        | 70  | 25  | ALDOA, LDHA, ALDOC, EDN1, HK2, BNIP3, TP1, SLC2A3, HMOX1, SLC2A1, GAPDH, EPO, ENO1, FLT1, AK3, IGF2, CDKN1A, CA9, ADM, PKM2, ADRA1B, CP, IGFBP2, PGK1, IGFBP3                                                                                                                                              | Genes that are transcriptionally regulated by HIF1A [GeneID=3091] .                                                                                              | up | 0 |
| M9221  | BROWNE_INTERFERON_RESPONSIVE_GENES          | 138 | 39  | RARRES3, TLR3, APOBEC3G, IFI44L, CXCL11, ISG20, CXCL10, ISG15, IL15RA, CASP1, BST2, KIF5C, IFI44, HLA-F, GBP2, GBP1, NMI, TRIM14, PML, RSAD2, IFI30, OAS1, OAS2, IFI35, TYMP, TAP1, XAF1, SAMHD1, UBE2L6, IDO1, STAT1, PSMB8, TRIM21, PSMB9, IFIT3, IFIT2, IFI27, OASL, TNFSF10                            | Genes up-regulated in primary fibroblast culture after treatment with interferon alpha for 6 h.                                                                  | up | 0 |
| M9809  | KEGG_CYTOKINE_CYTOKINE_RECEPTOR_INTERACTION | 536 | 70  | IL6ST, OSMR, LIFR, CD40, CCR5, CCR2, CX3CR1, VEGFA, TNFRSF6B, CD70, LIF, KDR, BMP7, TNFRSF11B, CCL3L1, IL4R, CCL3L3, INHBB, TNFRSF10B, IL12B, CXCL9, CCL20, IL10RB, CCL21, IL10RA, CCL18, TNFSF14, CXCL11, CXCL12, IL10, TGFB1, CXCL10, IL1B, CSF3R, IL15RA, EGFR, CCL4L2, RELT, CCL3, IL22RA1, TNFRSF1    | Cytokine-cytokine receptor interaction                                                                                                                           | up | 0 |
| M16476 | KEGG_CELL_ADHESION_MOLECULES_CAMS           | 270 | 51  | CADM3, OCLN, CADM1, L1CAM, SPN, HLA-A, HLA-C, CD40, HLA-B, HLA-E, HLA-DQA2, HLA-G, HLA-DQA1, HLA-F, HLA-DPA1, HLA-DRA, ITGAL, HLA-DRB1, ITGB2, ICOS, HLA-DRB5, HLA-DPB1, HLA-DOA, HLA-DOB, CD276, ITGA4, CLDN8, CD8A, CD8B, HLA-DMB, HLA-DMA, PDCC1, SDC3, ICAM1, SIGLEC1, VCAN, HLA-DQB1, CLDN16, CL      | Cell adhesion molecules (CAMs)                                                                                                                                   | up | 0 |

|        |                                                   |     |    |                                                                                                                                                                                                                                                                 |                                                    |    |   |
|--------|---------------------------------------------------|-----|----|-----------------------------------------------------------------------------------------------------------------------------------------------------------------------------------------------------------------------------------------------------------------|----------------------------------------------------|----|---|
| M16004 | KEGG_ANTIGEN_PROCESSING_AND_PRESENTATION          | 180 | 41 | KLRC4,KLRC2,KLRC3,PDIA3,CD8A,CD8B,HLA-DMB,CANX,HLA-DMA,B2M,TAPBP,KLRD1,CIITA,HLA-A,HLA-C,HLA-B,CTSS,HLA-E,HLA-DQA2,HLA-DQA1,HLA-G,HLA-F,HLA-DPA1,KLRC1,HLA-DRA,HLA-DQB1,HLA-DRB1,IFI30,HSPA1A,HSPA1B,CD74,HSPA2,TAP2,TAP1,HSPA6,HLA-DRB5,CD4,HLA-DPB1,HSPA5,HLA | Antigen processing and presentation                | up | 0 |
| M5669  | KEGG_NATURAL_KILLER_CELL_MEDIATE_D_CYTOTOXICITY   | 276 | 37 | KLRC2,KLRC3,KLRD1,CHP2,HLA-A,HLA-C,HLA-B,HLA-E,HLA-G,HCST,KLRC1,ITGAL,KLRK1,ITGB2,RAC2,ZAP70,FCER1G,TYROBP,VAV1,TNFSF10,FASLG,SHC1,FCGR3A,IFNGR2,FCGR3B,ICAM1,GZMB,IFNAR2,TNFRSF10B,LCK,LCP2,PRF1,CD244,CD247,PIK3R5,CHP,SH3BP2                                 | Natural killer cell mediated cytotoxicity          | up | 0 |
| M615   | KEGG_INTESTINAL_IMMUNE_NETWORK_FOR_IGA_PRODUCTION | 98  | 21 | HLA-DQB1,HLA-DRB1,HLA-DMB,CXCL12,HLA-DMA,IL10,TGFB1,CXCR4,ICOS,IL15RA,HLA-DRB5,HLA-DPB1,HLA-DOA,HLA-DOB,CD40,PIGR,ITGA4,HLA-DQA2,HLA-DQA1,HLA-DPA1,HLA-DRA                                                                                                      | Intestinal immune network for IgA production       | up | 0 |
| M12617 | KEGG_TYPE_I_DIABETES_MELLITUS                     | 90  | 25 | HLA-DQB1,PRF1,HLA-DRB1,FASLG,HLA-DMB,HLA-DMA,HLA-DRB5,IL1B,HLA-DPB1,HLA-DOA,GAD1,HLA-DOB,HLA-A,GZMB,HLA-C,HLA-B,PTPRN,HLA-E,HLA-DQA2,HLA-G,HLA-DQA1,HLA-F,HLA-DPA1,IL12B,HLA-DRA                                                                                | Type I diabetes mellitus                           | up | 0 |
| M3126  | KEGG_LEISHMANIA_INFECTION                         | 146 | 31 | PTGS2,MARCKSL1,TLR2,TLR4,HLA-DMB,HLA-DMA,TGFB1,IL10,IL1B,FCGR3A,FCGR3B,IFNGR2,NCF2,HLA-DQA2,HLA-DQA1,HLA-DPA1,IL12B,HLA-DRA,HLA-DQB1,HLA-DRB1,C3,ITGB2,FCGR1A,HLA-DRB5,HLA-DPB1,HLA-DOA,HLA-DOB,ITGA4,STAT1,FCGR2C,FCGR2A                                       | Leishmania infection                               | up | 0 |
| M13950 | KEGG_ASTHMA                                       | 62  | 17 | HLA-DQB1,HLA-DRB1,HLA-DMB,HLA-DMA,IL10,MS4A2,FCER1G,HLA-DRB5,HLA-DPB1,HLA-DOA,HLA-DOB,PRG2,CD40,HLA-DQA2,HLA-DQA1,HLA-DPA1,HLA-DRA                                                                                                                              | Asthma                                             | up | 0 |
| M13103 | KEGG_AUTOIMMUNE_THYROID_DISEASE                   | 108 | 23 | FASLG,HLA-DMB,HLA-DMA,IL10,HLA-A,HLA-C,GZMB,HLA-B,CD40,HLA-E,HLA-DQA2,HLA-G,HLA-DQA1,HLA-F,HLA-DPA1,HLA-DRA,HLA-DQB1,PRF1,HLA-DRB1,HLA-DRB5,HLA-DPB1,HLA-DOA,HLA-DOB                                                                                            | Autoimmune thyroid disease                         | up | 0 |
| M4741  | KEGG_SYSTEMIC_LUPUS_ERYTHEMATOSUS                 | 282 | 34 | C1QC,IL10,HIST1H2BK,C4A,CD40,HLA-DQA2,HLA-DQA1,C1QA,C1QB,HLA-DPA1,HLA-DRA,HLA-DRB1,HLA-DRB5,HLA-DPB1,HLA-DOA,HLA-DOB,HIST1H3D,HIST1H3H,HLA-DMB,HLA-DMA,FCGR3A,FCGR3B,HLA-DQB1,C7,C3,HIST1H2AD,FCGR1A,HIST1H2BE,TRIM21,FCGR2B,FCGR2C,H2AFY2,HIST1H2AJ,FCGR2A     | Systemic lupus erythematosus                       | up | 0 |
| M18615 | KEGG_ALLOGRAFT_REJECTION                          | 78  | 24 | HLA-DQB1,PRF1,HLA-DRB1,FASLG,HLA-DMB,HLA-DMA,IL10,HLA-DRB5,HLA-DPB1,HLA-DOA,HLA-DOB,HLA-A,GZMB,HLA-C,HLA-B,CD40,HLA-E,HLA-DQA2,HLA-G,HLA-DQA1,HLA-F,HLA-DPA1,IL12B,HLA-DRA                                                                                      | Allograft rejection                                | up | 0 |
| M13519 | KEGG_GRAFT_VERSUS_HOST_DISEASE                    | 86  | 24 | HLA-DQB1,PRF1,HLA-DRB1,FASLG,HLA-DMB,HLA-DMA,HLA-DRB5,IL1B,HLA-DPB1,HLA-DOA,KLRD1,HLA-DOB,HLA-A,GZMB,HLA-C,HLA-B,HLA-E,HLA-DQA2,HLA-G,HLA-DQA1,HLA-F,HLA-DPA1,KLRC1,HLA-DRA                                                                                     | Graft-versus-host disease                          | up | 0 |
| M12294 | KEGG_VIRAL_MYOCARDITIS                            | 148 | 28 | MYH15,HLA-DMB,HLA-DMA,ICAM1,HLA-A,HLA-C,CD40,HLA-B,HLA-E,HLA-DQA2,HLA-DQA1,HLA-G,HLA-F,CCND1,HLA-DPA1,HLA-DRA,SGCB,HLA-DQB1,ITGAL,PRF1,HLA-DRB1,DAG1,ITGB2,RAC2,HLA-DRB5,HLA-DPB1,HLA-DOA,HLA-DOB                                                               | Viral myocarditis                                  | up | 0 |
| M7146  | BIOCARTA_CLASSIC_PATHWAY                          | 30  | 6  | C7,C4A,C3,C1QC,C1QA,C1QB                                                                                                                                                                                                                                        | Classical Complement Pathway                       | up | 0 |
| M917   | BIOCARTA_COMP_PATHWAY                             | 40  | 7  | C7,C4A,MASP1,C3,C1QC,C1QA,C1QB                                                                                                                                                                                                                                  | Complement Pathway                                 | up | 0 |
| M19752 | REACTOME_COMPLEMENT_CASCADE                       | 102 | 7  | MASP1,C1QC,C4A,C1QA,C1QB,C7,C3                                                                                                                                                                                                                                  | Genes involved in Complement cascade               | up | 0 |
| M17386 | REACTOME_COSTIMULATION_BY_THE_CD28_FAMILY         | 142 | 25 | HLA-DMB,HLA-DMA,PDCD1,CD3G,LYN,CD3D,CD3E,HLA-DQA2,HLA-DQA1,LCK,HLA-DPA1,GRAP2,HLA-DRA,HLA-DQB1,HLA-DRB1,CD247,TRIB3,ICOS,HLA-DRB5,CD4,HLA-DPB1,HLA-DOA,HLA-DOB,VAV1,BTLA                                                                                        | Genes involved in Costimulation by the CD28 family | up | 0 |
| M13166 | REACTOME_DOWNSTREAM_TCR_SIGNALING                 | 96  | 20 | HLA-DQB1,HLA-DRB1,CD247,HLA-DMB,HLA-DMA,HLA-DRB5,CD4,INPP5D,HLA-DPB1,HLA-DOA,HLA-DOB,CD3G,CD3D,CD3E,HLA-DQA2,HLA-DQA1,CARD11,LCK,HLA-DPA1,HLA-DRA                                                                                                               | Genes involved in Downstream TCR signaling         | up | 0 |

|        |                                                                                   |      |     |                                                                                                                                                                                                                                                                  |                                                                                                                                                                                              |      |   |
|--------|-----------------------------------------------------------------------------------|------|-----|------------------------------------------------------------------------------------------------------------------------------------------------------------------------------------------------------------------------------------------------------------------|----------------------------------------------------------------------------------------------------------------------------------------------------------------------------------------------|------|---|
| M16523 | REACTOME_GENERATION_OF_SECOND_MESSENGER_MOLECULES                                 | 76   | 23  | HLA-DQB1,HLA-DRB1,CD247,HLA-DMB,HLA-DMA,ZAP70,HLA-DRB5,CD4,HLA-DPB1,HLA-DOA,HLA-DOB,ITK,CD3G,CD3D,CD3E,WAS,HLA-DQA2,HLA-DQA1,LCK,HLA-DPA1,GRAP2,HLA-DRA,LCP2                                                                                                     | Genes involved in Generation of second messenger molecules                                                                                                                                   | up   | 0 |
| M8240  | REACTOME_IMMUNOREGULATORY_INTERACTIONS_BETWEEN_A_LYMPHOID_AND_A_NON_LYMPHOID_CELL | 214  | 34  | B2M,KLRD1,CRTAM,CD3G,CD3D,CD3E,HLA-A,HLA-C,CD40,HLA-B,HLA-E,HLA-G,HLA-F,HCST,LILRB1,LILRB2,LILRB5,LILRB3,LILRB4,KLRC1,ITGAL,KLRK1,ITGB2,TYROBP,ITGA4,CD8A,CD8B,FCGR3A,ICAM1,C3,CD247,VCAM1,SELL,FCGR2B                                                           | Genes involved in Immunoregulatory interactions between a Lymphoid and a non-Lymphoid cell                                                                                                   | up   | 0 |
| M6121  | REACTOME_INITIAL_TRIGGERING_OF_COMPLEMENT                                         | 88   | 6   | MASP1,C3,C1QC,C4A,C1QA,C1QB                                                                                                                                                                                                                                      | Genes involved in Initial triggering of complement                                                                                                                                           | up   | 0 |
| M18810 | REACTOME_PD1_SIGNALING                                                            | 60   | 19  | HLA-DQB1,HLA-DRB1,CD247,HLA-DMB,HLA-DMA,PCDC1,HLA-DRB5,CD4,HLA-DPB1,HLA-DOA,HLA-DOB,CD3G,CD3D,CD3E,HLA-DQA2,HLA-DQA1,LCK,HLA-DPA1,HLA-DRA                                                                                                                        | Genes involved in PD-1 signaling                                                                                                                                                             | up   | 0 |
| M12494 | REACTOME_PHOSPHORYLATION_OF_CD3_AND_TCR_ZETA_CHAINS                               | 54   | 19  | HLA-DQB1,HLA-DRB1,CD247,HLA-DMB,HLA-DMA,HLA-DRB5,CD4,HLA-DPB1,HLA-DOA,HLA-DOB,PTPRC,CD3G,CD3D,CD3E,HLA-DQA2,HLA-DQA1,LCK,HLA-DPA1,HLA-DRA                                                                                                                        | Genes involved in Phosphorylation of CD3 and TCR zeta chains                                                                                                                                 | up   | 0 |
| M15381 | REACTOME_TCR_SIGNALING                                                            | 130  | 26  | HLA-DMB,HLA-DMA,CD3G,CD3D,CD3E,WAS,HLA-DQA2,HLA-DQA1,CARD11,LCK,HLA-DPA1,GRAP2,HLA-DRA,LCP2,HLA-DQB1,HLA-DRB1,CD247,ZAP70,HLA-DRB5,CD4,INPP5D,HLA-DPB1,HLA-DOA,HLA-DOB,PTPRC,ITK                                                                                 | Genes involved in TCR signaling                                                                                                                                                              | up   | 0 |
| M17299 | CHARAFE_BREAST_CANCER_LUMINAL_VS_MESENCHYMAL_UP                                   | 942  | 94  | SELENBP1,RAB27B,TOX3,KIAA1522,ST14,ABAT,ERBB2,DAAM1,HIP1R,PVRL4,SLC29A2,CASZ1,ALDH4A1,TMEM191A,ST6GALNAC2,INHBB,DOK7,ESRP1,ESRP2,DEGS2,EPB41L4A,TPRSS2,EPPK1,PCK2,SLC7A8,AZGP1,LAD1,FBP1,GRHL1,OVOL2,MUC1,FREM2,PREX1,ANO1,SYNGR1,RHOB,EPN3,PADI2,BSPRY,GRAMD4   | Genes up-regulated in luminal-like breast cancer cell lines compared to the mesenchymal-like ones.                                                                                           | down | 0 |
| M12795 | CHARAFE_BREAST_CANCER_BASAL_VS_MESENCHYMAL_UP                                     | 254  | 35  | RAB25,LAD1,KIAA1522,TACSTD2,AKR1B10,ST14,OVOL2,PPL,BLNK,MUC1,CBLC,TMEM191A,STEAP4,DMKN,SERPINA3,PPP1R14C,EPN3,BSPRY,TLCD1,ESRP1,ESRP2,EPB41L4A,EHF,GRAMD2,PRSS8,TSC22D3,MARVELD2,CD24,SCNN1A,KLK6,TRIM29,ATP1A1,RNF43,PROM2,GPR110                               | Genes up-regulated in basal-like breast cancer cell lines as compared to the mesenchymal-like ones.                                                                                          | down | 0 |
| M14791 | SABATES_COLORECTAL_ADENOMA_DN                                                     | 590  | 80  | GLDN,L1CAM,HOXD10,TMEM140,GUCA2B,KIF5C,LOC25845,LIFR,CD36,CHGB,GCNT2,MST1,AKAP12,CDA,WSCD1,NPY,SFRP1,SLC26A2,CHRDL1,C7,ALPI,HSD17B2,USP2,MFSD4,GPM6B,CCL21,FLRT2,HAPLN1,MT1M,LRRN2,ATP1A2,PCK1,FBLN1,DUSP1,CP,NR5A2,ADH1B,CXCL12,TLR7,CHAD,CDKN2B,ANK2,MS4A1,CH  | Genes down-regulated in colorectal adenoma compared to normal mucosa samples.                                                                                                                | down | 0 |
| M19062 | DODD_NASOPHARYNGEAL_CARCINOMA_UP                                                  | 3823 | 246 | BTC,ZNF395,GATM,UGCG,DNAH11,DUSP26,DMKN,BHLHE41,ALS2CL,RNF175,KNDC1,TRIM29,DUSP1,GLYATL1,SPATA18,NFE2L2,CDKN1C,EDAR,LYPD6B,ADH6,LRG1,SCNN1B,SCNN1A,FLJ23867,PRR15,CADM4,DNAJB13,CAA2,CD74,CNKSR1,SRPX2,STEAP4,SLC26A2,SIGIRR,PTGDS,CD180,GJB1,SLC16A5,SLC16A9,A  | Genes up-regulated in nasopharyngeal carcinoma (NPC) compared to the normal tissue.                                                                                                          | down | 0 |
| M13273 | DELYS_THYROID_CANCER_DN                                                           | 430  | 74  | GCAT,DNASE1L3,GLDC,APOD,WVVOX,MATN2,CRYAB,LIFR,MAGED4,CD36,TFPI,GRB14,EMCN,GNAI1,AKAP12,ALDH4A1,ESRRG,GAS1,SYNE1,SFRP1,TGFBR3,FCGBP,TNFRSF11B,CLMN,MYCN,CHRDL1,PLA2G7,FHL1,GNG11,EPB41L4B,CCL21,BCL2,MT1E,TBC1D4,MT1H,MT1G,MT1F,FLRT2,IGF2,PHYH,MT1X,FBLN1,CDH16 | Genes down-regulated in papillary thyroid carcinoma (PTC) compared to normal tissue.                                                                                                         | down | 0 |
| M1475  | FLECHNER_BIOPSY_KIDNEY_TRANSPLANT_REJECTED_VS_OK_DN                               | 1162 | 132 | SELENBP1,MXI1,GATM,CRYAA,CRYAB,TOX3,GRB10,HSD11B2,ABAT,GRB14,ACAA1,ACADSB,AHCY,ERBB4,PTH1R,ALDH4A1,ESRRG,GGH,RAB7L1,ACPP,CYP17A1,UBA1,FGF9,BNIP3,SMYD3,SERPINA5,SLC22A6,FGF1,PEPD,GRHR,CLIC5,MT1E,MT1G,SHMT1,PDZRN3,PCK2,PHYH,MT1X,PLG,PCK1,ACSM3,HPGD,SLC7A     | Genes down-regulated in kidney biopsies from patients with acute transplant rejection compared to the biopsies from patients with well functioning kidneys more than 1-year post transplant. | down | 0 |
| M3238  | SMID_BREAST_CANCER_RELAPSE_IN_BONE_UP                                             | 209  | 28  | SLC44A4,ADH1B,CHAD,GATA3,GP2,PLA1A,RAPGEF3,CA12,KIF5C,FBP1,TOX3,CYP2B7P1,ABAT,PSCA,ACADSB,FGFR3,PAH,CYP2B7P1,MUC1,PLK2,HMGCS2,AGR2,MLPH,SERPINA5,SEMA3B,FAM134B,BCAS1,TOM1L1                                                                                     | Genes up-regulated in bone relapse of breast cancer.                                                                                                                                         | down | 0 |
| M16932 | CHIANG_LIVER_CANCER_SUBCLASS_PROLIFERATION_DN                                     | 312  | 49  | ALDH1L1,AQP9,LDHD,SELENBP1,ADH1A,AGXT,AZGP1,AGXT2L1,MAT1A,RGN,DAO,GPT2,ALDH6A1,SERPING1,POR,BHMT,ABAT,SLC38A3,NAGS,OASL,NR1I3,BAAT,MLYCD,CYP8B1,DCXR,CYP2J2,OGDHL,RHOB,HPD,KNG1,GRHPR,ACADL,ADH6,AASS,PIPOX,CLDN14,FMO4,CYP4A22,ADH4,ETNK2,LOC255167,PKD4,PCK1,  | Top 200 marker genes down-regulated in the 'proliferation' subclass of hepatocellular carcinoma (HCC); characterized by increased proliferation                                              | down | 0 |



|        |                                                  |      |     |                                                                                                                                                                                                                                                                 |                                                                                                                                                                                          |      |          |
|--------|--------------------------------------------------|------|-----|-----------------------------------------------------------------------------------------------------------------------------------------------------------------------------------------------------------------------------------------------------------------|------------------------------------------------------------------------------------------------------------------------------------------------------------------------------------------|------|----------|
| M5408  | RODWELL_AGING_KIDNEY_DN                          | 263  | 30  | LDHB,CRABP1,SELENBP1,SLC4A1,GNNG7,GABARAPL1,WNK1,TOX3,PALM,EGF,GAD1,RHOBTB3,LPL,GABARAPL1,ESRRG,BMP7,CLDN8,KNK1,NUDT4,PTGER3,PEBP1,OAT,ABTB2,AASS,TPRSD2,PHYH,BRP44L,MPPED2,PEG3,ZIM2                                                                           | Genes whose expression decreases with age in normal kidney.                                                                                                                              | down | 0        |
| M5988  | REACTOME_SLC_MEDIATED_TRANSMEMBRANE_TRANSPORT    | 340  | 47  | SLC36A2,SLC6A20,SLC44A4,SLC6A3,SLC9A3,SLC7A8,SLC7A5,SLC16A1,SLC2A5,SLC2A3,SLC2A1,SLC4A1,SLC4A3,SLC34A1,SLC38A1,SLC2A12,SLC38A3,SLC11A1,SLC30A2,SLC6A13,SLC6A19,SLC13A1,SLC13A2,SLC13A3,SLC5A11,SLC5A3,SLC20A2,SLC5A1,SLC26A2,SLC1A4,SLC1A3,SLC43A1,SLC26A6,SLC3 | Genes involved in SLC-mediated transmembrane transport                                                                                                                                   | down | 0        |
| M3045  | CHEMNITZ_RESPONSE_TO_PROSTAGLANDIN_E2_UP         | 298  | 35  | FBXO17,SARS2,TTK,PTTG1,SLC16A1,EIF4EBP1,ANK2,ASPM,OLFML2A,UHRF1,SPAG5,LMNB1,AFAP1L2,AFAP1L1,TK1,PEA15,STAMBPL1,PVT1,MKI67,DLEU2,TOP2A,NUSAP1,TNFRSF9,KSR1,SLC39A14,GJC1,HJURP,BUB1,SHMT2,FLT1,CENPF,MLF1IP,SMC4,CCNB1,KIF20A                                    | Genes up-regulated in CD4+ [GeneID=920] T lymphocytes after stimulation with prostaglandin E2 [PubChem=5280360] .                                                                        | up   | 1.00E-04 |
| M4502  | GAL_LEUKEMIC_STEM_CELL_DN                        | 518  | 86  | KIFC1,CADM3,LILRA6,NCF2,SIRPA,C1QA,LILRB1,ZWINT,FER1L4,CX3CR1,LILRB4,PRDM1,VSIG4,CLEC5A,CYP1B1,LMNB1,IFI30,SLC11A1,CD68,TP11,ALDH4A1,CDC42EP3,LGALS3,LGALS1,LAMA4,ADAP2,DHFR,SERPINA1,CHST15,TOP2A,LYZ,CD163,VCAN,G0S2,GPR65,HMMR,FCGR1B,BUB1,PHLDA1,LILRA6,LIL | Genes down-regulated in leukemic stem cells (LSC)                                                                                                                                        | up   | 1.00E-04 |
| M4235  | GRAHAM_CML_DIVIDING_VS_NORMAL_QUIESCENT_DN       | 207  | 29  | MPZL2,CRHBP,TSPAN6,TCEAL2,CXCL11,CH25H,IL1B,HLA-DQA1,H1F0,CD40,HLA-DQA1,TFPI,HLA-DPA1,GBP2,TCF4,ADAM28,TNFSF10,CYTIP,EVI2A,HCP5,HLA-DQB1,IFI16,HLA-DQB1,CLEC2B,PTPRC,SELL,BIRC3,ANXA5,SOD2                                                                      | Genes down-regulated in quiescent CD34+ [GeneID=8842] cells isolated from peripheral blood of normal donors compared to the dividing cells from CML (chronic myeloid leukemia) patients. | up   | 1.00E-04 |
| M15015 | FARMER_BREAST_CANCER_CLUSTER_1                   | 120  | 24  | CYTIP,CD8A,RSAD2,OAS1,IFI44L,OAS2,ISG15,IL10RA,CD2,XAF1,ITK,GIMAP4,CD3D,GZMA,IFI44,IFIT3,GZMK,OASL,CCR5,GMFG,CCR2,LCK,FKBP11,LCP2                                                                                                                               | Cluster 1: interferon                                                                                                                                                                    | up   | 1.00E-04 |
| M4872  | TARTE_PLASMA_CELL_VS_PLASMABLAST_UP              | 897  | 100 | C4A,FSTL1,HOXD10,B2M,RPLP0,CRYAB,GPER,SERPING1,PTPRN,SIRPA,HLA-DQA1,RPS14,HLA-DOB,AVPR1B,PCDHGA10,IL4R,SERPINA3,SERPINA1,HSF4,LYZ,HLA-DQB2,RPL39,PCSK6,PKC1,QPCT,LRP1,DUSP1,CXCL12,TDGF3,CPA3,RELB,FBP1,HLA-F,COL1A1,TNFAIP3,TNFAIP2,SPTB,APOC1,MDK,RPL7A,NR4A1 | Genes up-regulated in mature plasma cells compared with plasmablastic B lymphocytes.                                                                                                     | up   | 1.00E-04 |
| M6890  | HELLER_HDAC_TARGETS_DN                           | 506  | 57  | ADCY7,CD52,ISG20,RPS19,CCR2,HLA-DRA,HSPA1A,HSPA1B,SERPINH1,TCF4,BLNK,S100A11,CLEC7A,PDIA3,GJA1,MYC,CEACAM1,FMNL1,MYCN,CCND1,CCND2,GPM6B,MYOM2,BCL2,CLEC2B,SHMT2,LRRC41,CD180,QPCT,PBX1,PSAT1,APOBEC3G,PMAIP1,SLC7A5,SLC38A1,FGFR3,LAPTM5,ARHGDI1,ABHD14A,IL21R, | Genes down-regulated in at least one of three multiple myeloma (MM) cell lines by TSA [PubChem=5562] .                                                                                   | up   | 1.00E-04 |
| M4950  | ACEVEDO_LIVER_TUMOR_VS_NORMAL_ADJACENT_TISSUE_UP | 1728 | 96  | RPLP0,KIAA1522,SERPINH1,PEA15,RGS5,LYZ,SERPINB1,FOXC1,DEGS1,HLA-C,HLA-B,HLA-F,TCFL5,CCL5,PTTG1IP,UBD,FKBP5,TMED7,COL5A2,APOLD1,BTN3A2,SFXN2,TK1,JDH1,PLA2G4C,CANX,ATP5S,SLC26A6,FKBP11,CXCL9,IL10RB,TOM1L1,CSTB,GBP4,STAMBPL1,KCTD3,SREBF2,FAM84B,CD93,MPV17L,T | Genes up-regulated in liver tumor compared to the normal adjacent tissue.                                                                                                                | up   | 1.00E-04 |
| M2118  | SMID_BREAST_CANCER_RELAPSE_IN_PLEURA_DN          | 83   | 12  | GABBR1,UBD,HLA-DQB1,CXCL9,CEACAM1,HCG26,CHAC1,CCL18,SIX1,CP,FABP7,PSAT1                                                                                                                                                                                         | Genes down-regulated in pleura relapse of breast cancer.                                                                                                                                 | up   | 1.00E-04 |
| M3015  | HUANG_DASATINIB_RESISTANCE_UP                    | 152  | 25  | OSMR,FSTL1,TGFB,IL15RA,EGFR,KIAA1949,LYN,IFI16,F3,TFPI,BTN3A3,GBP3,BTN3A2,DUSP10,FXDY5,SAMD9L,RAC2,CDC42EP3,ANXA1,PSMB8,PSMB9,IFIT3,ITGA5,PLAU,NNMT                                                                                                             | Genes whose expression positively correlated with sensitivity of breast cancer cell lines to dasatinib [PubChem=3062316] .                                                               | up   | 1.00E-04 |
| M17723 | CHAUHAN_RESPONSE_TO_METHOXYESTRADIOL_DN          | 233  | 35  | PDLIM1,MXI1,B2M,TAPBP,RPL12,HADH,TMSB10,HLA-G,TNFAIP3,CCL3,MCL1,ARPC5,CD74,1DH2,ARHGDI1,MKI67,LGALS1,S100A10,UBA1,CYFIP2,MARCKS,SLC1A4,PCP4,ADM,BTG2,PKM2,UBC,TUBB,VIM,ENO2,IL2RG,HCLS1,LSP1,HSP90B1,PGK1                                                       | Genes down-regulated by 2-methoxyestradiol (2ME2) [PubChem=1573] in the MM.1S cell line (multiple myeloma) sensitive to dexamethasone [PubChem=5743] .                                   | up   | 1.00E-04 |

|        |                                                      |      |     |                                                                                                                                                                                                                                                                                                                                                                                                                                                                                                                     |                                                                                                                                                             |      |          |
|--------|------------------------------------------------------|------|-----|---------------------------------------------------------------------------------------------------------------------------------------------------------------------------------------------------------------------------------------------------------------------------------------------------------------------------------------------------------------------------------------------------------------------------------------------------------------------------------------------------------------------|-------------------------------------------------------------------------------------------------------------------------------------------------------------|------|----------|
| M17033 | LINDSTEDT_DENDRITIC_CELL_MATURATION_A                | 110  | 21  | TLR2,CXCL11,SLC7A5,CXCL10,ISG15,IL1B,ICAM1,PLA2G7,IL12B,GBP1,FKBP5,NFKBIE,TNC,CCL5,CCL4,CCL20,PLAT,PLEK,STAT1,TNFSF9,SOD2                                                                                                                                                                                                                                                                                                                                                                                           | Maturation of monocyte-derived dendritic cells (DC) in response to inflammatory stimuli: genes up-regulated only at 8 hr after the stimulation (cluster A). | up   | 1.00E-04 |
| M9343  | BOYVAULT_LIVER_CANCER_SUBCLASS_G5_DN                 | 56   | 17  | HMG3,LAPTM5,IL10RA,CLEC2B,TGM2,WIPF1,HLA-DPB1,ARHGDI1,ICAM1,S100A11,IFI44,IFI16,STAT1,SIRPA,RAB31,HLA-DPA1,ARL4C                                                                                                                                                                                                                                                                                                                                                                                                    | Down-regulated genes in hepatocellular carcinoma (HCC) subclass G5                                                                                          | up   | 1.00E-04 |
| M10702 | JAEGER_METASTASIS_DN                                 | 550  | 71  | PTGS1,DNASE1L3,AQP3,LTB4R,RAB25,TPSB2,S100A2,MATN2,PRELP,KRT19,TACSTD2,ST14,LAMC2,ENPP2,CDA,TPD52L1,ETS2,NTRK2,FCGBP,BMP7,FERMT1,GJA1,TPSAB1,TPSB2,ESRP2,EHF,COL7A1,CD24,MT1M,EPPK1,TRIM29,OPCT,ABCC3,MPZL2,MCOLN3,GATA3,SLC2A1,CPA3,EGFR,LAD1,CA12,CHP2,AKR1B1                                                                                                                                                                                                                                                     | Genes down-regulated in metastases from malignant melanoma compared to the primary tumors.                                                                  | down | 1.00E-04 |
| M11837 | RODWELL_AGING_KIDNEY_NO_BLOOD_DN                     | 286  | 31  | LDHB,CRABP1,GABARAPL1,FA2H,LRRC2,WNK1,TOX3,FAM171A1,PALM,EGF,GAD1,RHOBTB3,LPL,GABARAPL1,ESRRG,BMP7,CLDN8,BCAN,KNG1,NUDT4,PTGER3,CYB5A,PEBP1,OAT,ASS,TMPRSS2,PHYH,BRP44L,MPPED2,PEG3,ZIM2                                                                                                                                                                                                                                                                                                                            | Genes whose expression decreases with age in normal kidney                                                                                                  | down | 1.00E-04 |
| M16473 | KEGG_ALDOSTERONE_REGULATED_SODIUM_REABSORPTION       | 86   | 11  | ATP1B1,FXD4,ATP1B2,KCNJ1,PIK3R5,SCNN1G,SCNN1B,SCNN1A,ATP1A1,ATP1A2,HSD11B2                                                                                                                                                                                                                                                                                                                                                                                                                                          | Aldosterone-regulated sodium reabsorption                                                                                                                   | down | 1.00E-04 |
| M10501 | RODRIGUES_THYROID_CARCINOMA_POORLY_DIFFERENTIATED_UP | 1325 | 70  | OSMR,CDCA7,HIST1H2BK,SPIRE1,ZWINT,GNAI1,SERPINH1,HIST1H2BK,LAPTM4B,MKI67,GA S2L3,LEPROTL1,KISS1R,P4HA1,TBC1D7,HIST1H2BE,CCNB1,PSAT1,EIF4EBP1,CDKN2B,SLC 2A1,ENC1,NETO2,TNFRSF12A,GINS2,GLT25D1,NBN,NXP4,NUSAP1,IFI16,GPNMB,ANXA1,T NFSF9,SMC4,IL6ST,GPT2,STC2,LMN                                                                                                                                                                                                                                                   | Genes up-regulated in poorly differentiated thyroid carcinoma (PDT) compared to normal thyroid tissue.                                                      | up   | 2.00E-04 |
| M17788 | LINDGREN_BLADDER_CANCER_CLUSTER_1_DN                 | 754  | 89  | KIFC1,EFNA1,PTTG1,CDCA7,CDCA2,PITX2,H1F0,DEPDC1,MGAT1,CGN,ZWINT,PMP22,NEK2,ERBB2,AKAP12,DAG1,TAGLN2,TK1,PEA15,IDH2,LGALS1,CELSR3,MCAM,RAD54L,LAMA4,NTRK2,TCF19,NRP2,FERMT3,PDIA5,PIK3AP1,TOP2A,PEPD,PRG2,SH2D2A,SLC26A6,HSD3B7,UB1,PCSK6,KIF21B,MT1G,SELL,HCLS                                                                                                                                                                                                                                                      | Down-regulated genes whose expression profile is specific to Cluster 1 of urothelial cell carcinoma (UCC) tumors.                                           | up   | 2.00E-04 |
| M18107 | WILENSKY_RESPONSE_TO_DARAPLADIB                      | 56   | 16  | CXCR3,CCL5,HLA-DMA,CD68,EVI2A,HMOX1,EVI2B,CD4,LAIR1,CHI3L1,CTSS,CYBB,ARRB2,CCR2,PLA2G7,BIN2                                                                                                                                                                                                                                                                                                                                                                                                                         | Atherosclerotic process genes whose coronary expression changed after darapladib [PubChem=9939609] treatment.                                               | up   | 2.00E-04 |
| M12112 | VART_KSHV_INFECTION_ANGIOGENIC_MARKERS_UP            | 337  | 58  | F2RL3,PTGS2,EFNA1,OSMR,IL6ST,PGF,PTGS1,CXCL11,CXCL12,TGFB1,IL10,MMP1,CXCL10,S1PR1,IL1B,ERAP1,WNT10A,EFNB2,HIF1A,CCR5,F3,DLL4,VEGFA,TNFAIP2,FGFR2,FGFR3,ERBB2,CCL5,TIMP1,ANGPTL1,PLAT,KDR,SFRP2,NOTCH4,GRB7,PLAU,NRP2,NRP1,HEY1,CXCR4,HMOX1,FGF1,ANGPT2,SH2D2A,CD52,CD53,AQP3,GATA3,CD3G,CD3D,CECR1,ITGAL,ITGB2,LAPTM5,RAC2,ICOS,UBASH3A,ARHGDI1,ITK,IKZF1,TARP,VAV1,PSMB9,CORO1A,CYFIP2,SASH3,SLA,CXCR4,EVI2A,EVI2B,ARHGFE6,ARHGAP25,IFNAR2,TARP,BTG2,LCK,CD247,TRIM14,RNASET2,CD2,SELPLG,PTPRC,SELL,HCLS1,MAL,GMFG | Angiogenic markers up-regulated in lymph endothelial cells upon infection with KSHV (Kaposi's sarcoma herpes virus).                                        | up   | 2.00E-04 |
| M2200  | LEE_DIFFERENTIATING_T_LYMPHOCYTE                     | 299  | 42  | CD52,CD53,AQP3,GATA3,CD3G,CD3D,CECR1,ITGAL,ITGB2,LAPTM5,RAC2,ICOS,UBASH3A,ARHGDI1,ITK,IKZF1,TARP,VAV1,PSMB9,CORO1A,CYFIP2,SASH3,SLA,CXCR4,EVI2A,EVI2B,ARHGFE6,ARHGAP25,IFNAR2,TARP,BTG2,LCK,CD247,TRIM14,RNASET2,CD2,SELPLG,PTPRC,SELL,HCLS1,MAL,GMFG                                                                                                                                                                                                                                                               | Genes enriched at every T lymphocyte differentiation stage compared to the early passage fetal thymic stromal cultures (TSC).                               | up   | 2.00E-04 |
| M5929  | CROONQUIST_STROMAL_STIMULATION_UP                    | 98   | 17  | LUM,CCL4,CTGF,TGFB1,TGM2,THBS2,MYOF,SFTPB,SLC25A4,SPARC,LAMA4,DUSP1,ID1,SU LF1,COL1A2,VCAN,NNMT                                                                                                                                                                                                                                                                                                                                                                                                                     | Genes up-regulated in ANBL-6 cell line (multiple myeloma)                                                                                                   | up   | 2.00E-04 |
| M4448  | BOYVAULT_LIVER_CANCER_SUBCLASS_G2_3_UP               | 116  | 10  | SLC26A2,DNAJC6,PKM2,TFPI,SLC38A1,NEK2,MKI67,NDUFA4L2,MLF1IP,ABCG1                                                                                                                                                                                                                                                                                                                                                                                                                                                   | Up-regulated genes in hepatocellular carcinoma (HCC) subclass G23                                                                                           | up   | 2.00E-04 |
| M4844  | KEGG_CHEMOKINE_SIGNALING_PATHWAY                     | 382  | 41  | ADCY7,ADCY6,CXCL11,CXCL12,CXCL10,GNG7,CCL4L2,CCR5,ARRB2,CX3CR1,CCR2,CCL3,GNAI1,CCL5,CCL4,RAC2,ITK,VAV1,CXCL16,PREX1,CXCR2,CXCR3,CXCR4,CCL3L1,CCL3L3,SHC1,PLCB2,LYN,WAS,GNB5,GNB4,PRKCZ,CXCL9,GNG11,CCL20,CCL21,PIK3R5,HCK,STAT1,CCL18,JAK3                                                                                                                                                                                                                                                                          | Chemokine signaling pathway                                                                                                                                 | up   | 2.00E-04 |
| M10961 | GOZGIT_ESR1_TARGETS_DN                               | 1620 | 173 | ISG20,TMEM140,DIRAS2,RAB27B,UGCG,SIPA1L2,TFPI,ABAT,CYP1B1,DUSP10,ARG2,ELF5,SERPINA5,SERPINA3,SERPINA1,PRSS35,CEACAM1,EPB41L1,DEGS2,HLA-DQB1,AOX1,CP,GRIK3,CXCL12,CDKN2B,TGFB1,STMN3,CCL5,CXCL16,ST8SIA4,PTTG1IP,C4A,PMPEA1,EGLN3,PRSS8,XAF1,GPNMB,SCNN1A,COBLL1                                                                                                                                                                                                                                                     | Genes down-regulated in TMX2-28 cells (breast cancer) which do not express ESR1 [GeneID=2099] compared to the parental MCF7 cells which do.                 | up   | 3.00E-04 |

|        |                                                                      |     |     |                                                                                                                                                                                                                                                                         |                                                                                                                                                  |    |          |
|--------|----------------------------------------------------------------------|-----|-----|-------------------------------------------------------------------------------------------------------------------------------------------------------------------------------------------------------------------------------------------------------------------------|--------------------------------------------------------------------------------------------------------------------------------------------------|----|----------|
| M11840 | SHEPARD_BMYB_MORPHOLINO_DN                                           | 320 | 47  | <p>GRIK3,TTK,VTN,NR2E1,AQP3,SLC2A5,CDCA2,GPT2,ASPM,EOMES,NR0B2,PTPRN,UHRF1,COL1A2,COL1A1,PMP22,RBP4,PFKFB4,SFXN2,MDK,TK1,FGG,SLC29A2,FGA,LHX1,MKI67,SLC6A13,DHFR,SFRP1,PRODH2,FABP7,KIF23,SYNGR1,HEY1,SARDH,SOX11,GRHPR,SCIN,C3,CBPA,ATP1A1,PKK1,CCNB1,PYGL,SULF1</p>   | Human orthologs of genes down-regulated in zebra fish after knockdown of BMYB [GeneID=4605] by morpholino.                                       | up | 3.00E-04 |
| M13763 | RADAEVA_RESPONSE_TO_IFNA1_UP                                         | 66  | 16  | E2F2,IFITM3,IFI44L,CXCL11,IFI35,CXCL10,VCAM1,BCL2,BST2,CLK3,HLA-C,STAT1,HLA-E,TNFSF10,IFI27,IRF1                                                                                                                                                                        | Genes up-regulated in primary hepatocytes and Hep3B (hepatocyte) cells in response to IFNA [GeneID=3439] .                                       | up | 3.00E-04 |
| M14437 | VALK_AML_CLUSTER_5                                                   | 68  | 17  | SIRPB1,TLR8,EFHD2,VDR,TYMP,NOD2,SMPDL3A,LILRA6,IFNGR2,SIRPA,LILRB1,LILRB2,RASF4,LILRB3,SIGLEC7,VCAN,SLC15A3                                                                                                                                                             | Top 40 genes from cluster 5 of acute myeloid leukemia (AML) expression profile; 96% of the samples are FAB M4 or M5 subtype.                     | up | 3.00E-04 |
| M4308  | SATO_SILENCED_BY_METHYLATION_IN_PANCREATIC_CANCER_1                  | 977 | 131 | LDHB,PGF,ISG20,GIT2,TYRO3,GPER,CYP2B7P1,HNF4A,ST14,CYP1B1,DUSP10,KCNJ2,RAC2,TRPV2,ELF5,BNIP3,SERPINA1,ANGPT2,ST6GALNAC2,IGF2,INS-IGF2,KSR1,C3,LRRCC31,EPB41L4A,PML,PDK1,QPCT,PSAT1,CXCL12,NR2E1,RNASE2,DNAJC6,CPA3,IL1B,BST2,CHAC1,HLA-C,HLA-B,CDO1,HLA-G,TFAP2C        | Genes up-regulated in the pancreatic cancer cell lines (AsPC1                                                                                    | up | 3.00E-04 |
| M1262  | REACTOME_GRB2_SOS_PROVIDES_LINKAGE_TO_MAPK_SIGNALING_FOR_INTERGRINS_ | 32  | 6   | APBB1IP,VWF,FGG,FGA,FGB,FN1                                                                                                                                                                                                                                             | Genes involved in GRB2:SOS provides linkage to MAPK signaling for Intergrins                                                                     | up | 3.00E-04 |
| M17693 | GARY_CD5_TARGETS_UP                                                  | 971 | 78  | <p>GNG7,WNT10A,TCF4,SYNGR3,RGS1,P4HA1,KIAA1949,WAS,DOK3,WIPF1,PDK1,SHMT2,LRR C41,ACLY,PCK2,LSP1,PSAT1,DAK,TGFB1,IL10,MFHAS1,SLC2A3,RELB,HLA-E,DDIT4,TNFAIP3,CCNG1,CCL4,CDKN1A,SLC1A4,SLC43A1,LCK,TMC8,TNFSF9,CD52,WWOX,WNK1,LILRB4,VEGFA,ALDOC,CD70,CD74,IDH2,SCD,P</p> | Genes up-regulated in Daudi cells (B lymphocytes) stably expressing CD5 [GeneID=921] off a plasmid vector.                                       | up | 4.00E-04 |
| M14877 | BASAKI_YBX1_TARGETS_DN                                               | 794 | 78  | <p>HLA-DMA,HLA-DMB,IL6ST,FAM110C,PTGS1,MX1,ISG20,MALL,GBP5,VEGFA,TFPI,STC1,BTN3A3,BTN3A2,GRB14,ALDOC,XIST,CASZ1,LAMB1,SCD,KCNK3,IFI27,GAS2L3,ARSD,STOX1,MARCKSL1,SMPDL3A,P4HA1,SERPINA1,ADM,SERPINB1,RAP1GAP,HK2,RPL37,TPCN1,RNASET2,PCSK6,PHLD A1,PDK1,BTN3A2,BTN</p>  | Genes down-regulated in SKOC-3 cells (ovarian cancer) after YB-1 (YBX1) [GeneID=4904] knockdown by RNAi.                                         | up | 4.00E-04 |
| M5792  | LI_AMPLIFIED_IN_LUNG_CANCER                                          | 332 | 48  | RPL17,LDHB,ATP1B1,LDHA,RPL36A,CRABP2,SLC7A5,ENC1,AKR1B10,COL1A2,CSTB,COL1A1,ALDOA,MCL1,ERBB2,MDK,TIMP1,FGG,RPS27,FGB,MSLN,IDH2,LAPTM4B,MUC1,P4HB,RPL23A,PLAU,UCHL1,PRDX4,RPS2,CANX,PFKP,MMP12,UQCRH,PKM2,RPL35,RPL37,MIF,SYN1,HSPA5,THBS2,SCNN1A,ENO1,PLP2,STAT         | Genes with increased copy number that correlates with increased expression across six different lung adenocarcinoma cell lines.                  | up | 4.00E-04 |
| M12890 | ROZANOV_MMP14_TARGETS_UP                                             | 534 | 68  | RARRES3,PTGS1,PDLIM1,ISG20,CDCA7,CTGF,N4BP2L1,SMOX,S100A2,MATN2,NCF2,SIRPA,ALDOC,OAS1,SERPINH1,HLA-DPB1,LAMB1,SLAMF7,APOL3,LAMA4,SRPX2,QPRT,NNMT,SOBP,TNFRSF11B,SERPINA5,CHST15,ERRF1,MMP14,CCND2,CCL20,HCLS1,SOD3,NUPR1,MAGED4B,TLR2,CSPG4,PMAIP1,KRT86,CA12,          | Genes up-regulated in HT1080 cells (fibrosarcoma) over-expressing MMP14 [GeneID=4323] compared to those with knockdown of the gene by RNAi.      | up | 4.00E-04 |
| M4562  | LENAOUR_DENDRITIC_CELL_MATURATION_UP                                 | 186 | 25  | ATP1B1,HMGN3,DNASE1L3,SLA,TGFA,GATM,PFKP,CYB5A,MMP12,HLA-DQA1,TNFAIP6,CCND2,PEBP1,HLA-DQB1,RAP1GAP,CD74,TGM2,SCARB1,HLA-DPB1,LPL,IDO1,BIRC3,ABCG1,FCGR2B,DUSP1                                                                                                          | Genes up-regulated during in vitro maturation of CD14+ [GeneID=929] monocytes (day 0) into immature (day 7) and mature dendritic cells (day 14). | up | 4.00E-04 |
| M12029 | BILD_HRAS_ONCOGENIC_SIGNATURE                                        | 543 | 58  | HMGN3,PNMA2,PTGS2,FAM110C,MALL,VEGFA,CYP1B1,XIST,LIF,ARG2,AHNAK2,KLF6,GAS1,FERMT1,AGPAT9,TGFA,LYN,MMP14,TNFRSF10B,SERPINB1,G0S2,HK2,FAM46B,CYP27B1,CCL20,MEG3,PHLDA1,FLRT3,TBX3,DUSP1,TOB1,SH2D5,SLC2A3,DNAJC6,IL1B,ELOVL7,PTHLH,LRAT,FGFR2,LOC400931,MCL1,TNFR         | Genes selected in supervised analyses to discriminate cells expressing activated HRAS [GeneID=3265] oncogene from control cells expressing GFP.  | up | 4.00E-04 |
| M2540  | KYNG_DNA_DAMAGE_BY_GAMMA_AND_UV_RADIATION                            | 82  | 12  | NRP2,CRHBP,VCAM1,FMO4,PLCL1,SLC1A3,CXCR4,EVI2A,IL10RB,LOX,CCND1,NNMT                                                                                                                                                                                                    | Gamma and UV responding genes.                                                                                                                   | up | 4.00E-04 |
| M3218  | MOSERLE_IFNA_RESPONSE                                                | 62  | 17  | IFIH1,RTP4,RSAD2,IFI44L,OAS1,OAS2,SAMD9L,CMPK2,CXCL10,IFI44,IFI16,STAT1,IFIT3,IFIT2,OASL,TNFSF10,GBP1                                                                                                                                                                   | Top 50 genes up-regulated in ovarian cancer progenitor cells (also known as side population                                                      | up | 4.00E-04 |

|        |                                                   |      |     |                                                                                                                                                                                                                                                                  |                                                                                                                                                                 |      |          |
|--------|---------------------------------------------------|------|-----|------------------------------------------------------------------------------------------------------------------------------------------------------------------------------------------------------------------------------------------------------------------|-----------------------------------------------------------------------------------------------------------------------------------------------------------------|------|----------|
| M15425 | VANTVEER_BREAST_CANCER_ESR1_DN                    | 448  | 57  | LDHB,MALL,KCNK5,LILRB3,ST14,VGLL1,CTSL2,NFKBIE,CHI3L1,S100A10,RAD54L,LYN,ADM,FOX C1,NMI,NMB,BUB1,TRIM29,CD180,CCL18,SOD2,PHGDH,PSAT1,DUSP9,TTK,SLC2A5,IL15RA,SAMD4A,FDNC3B,PDXK,LAD1,TMSB10,HIF1A,CSTB,TNFAIP3,FAM171A1,GBP1,ASS1,ST8SIA1,ITGB2,CCL5,NDRG1,DEFB1 | Down-regulated genes from the optimal set of 550 markers discriminating breast cancer samples by ESR1 [GeneID=2099] expression: ER(+) vs ER(-) tumors.          | up   | 4.00E-04 |
| M4491  | CROONQUIST_NRAS_VS_STROMAL_STIMULATION_DN         | 166  | 20  | GJA1,CTGF,TGFBI,ARHGAP11A,SLC25A4,COL1A2,VCAN,TPM1,TK1,LAMB1,THBS2,SFTPB,RAD51AP1,MKI67,SPARC,CCNB1,LAMA4,DUSP1,ID1,SULF1                                                                                                                                        | Genes down-regulated in ANBL-6 cell line (multiple myeloma)                                                                                                     | up   | 4.00E-04 |
| M16441 | REACTOME_INTEGRIN_CELL_SURFACE_INTERACTIONS       | 164  | 23  | VTN,RAPGEF3,ICAM1,LAMC3,COL1A2,COL1A1,ITGAL,TNC,ITGB2,APBB1IP,VCAM1,FGG,FGA,FGB,LAMB1,FN1,COL4A3,ITGA2,ITGA4,VWF,ITGA5,PECAM1,ITGAD                                                                                                                              | Genes involved in Integrin cell surface interactions                                                                                                            | up   | 4.00E-04 |
| M15472 | VECCHI_GASTRIC_CANCER_EARLY_DN                    | 811  | 97  | LDHB,AQP4,AGXT2L1,SOSTDC1,FAM150B,GNG7,GPER,KIF5C,LIFR,CD36,CCR2,ABAT,CHGB,SLC2A12,CYP1B1,GCNT2,ENPP2,PCDH20,HLA-DOB,ESRRG,SLAMF7,KLF15,GAS1,SFRP1,MAP9,KCNJ16,KCNJ15,FAM3B,SOBP,BNIP3,ATP4B,GIF,CHRDL1,GRIP2,C7,LOC400043,FHL1,MFSD4,GPM6B,FAM46C,MT1E,WIPF3,M  | Down-regulated genes distinguishing between early gastric cancer (EGC) and normal tissue samples.                                                               | down | 4.00E-04 |
| M244   | SMID_BREAST_CANCER_RELAPSE_IN_BRAIN_DN            | 183  | 20  | IL6ST,MLPH,SLC44A4,SLC7A8,SELENBP1,GSTM3,SERPINA5,GATA3,C4A,RAB27B,CA12,TOX3,ST6GALNAC2,SLC27A2,ERBB4,DACH1,BIK,TJP3,MAP9,AGR2                                                                                                                                   | Genes down-regulated in brain relapse of breast cancer.                                                                                                         | down | 4.00E-04 |
| M9206  | YAMASHITA_LIVER_CANCER_STEM_CELL_DN               | 152  | 20  | ALDH1L1,MASP1,CDKN2A,F11,KNG1,ALDH6A1,APCS,PPARGC1A,HNF4A,SLC27A2,FKBP5,FMO4,HRG,ABCB1,NR1I3,ABCG5,AOX1,CYP8B1,CD14,UGT2B7                                                                                                                                       | Genes down-regulated in hepatocellular carcinoma (HCC) cells with hepatic stem cell properties.                                                                 | down | 4.00E-04 |
| M17778 | DIAZ_CHRONIC_MEYLOGENOUS_LEUKEMIA_DN              | 250  | 45  | CRHBP,TLR2,CD53,ISG20,GATA3,TGFBI,BCR,CECR1,HLA-C,HLA-B,CST7,CCR2,LILRB4,MNDA,CSTA,CLEC5A,MVP,MCL1,IFI30,OAS2,BLNK,LPL,RPL23A,ADAP2,NKG7,HLA-DMB,SLC1A3,RPL41,BTG2,FCGR1A,FCGR1C,SGCB,RPL39,IL10RA,MYOF,MS4A6A,GAPDH,MS4A4A,PTPRE,RPL18A,SELL,ANXA5,LILRA6,LILR  | Genes down-regulated in CD34+ [GeneID=947] cells isolated from bone marrow of CML (chronic myelogenous leukemia) patients                                       | up   | 5.00E-04 |
| M7284  | SEITZ_NEOPLASTIC_TRANSFORMATION_BY_8P_DELETION_UP | 159  | 29  | RARRES3,TLR4,IFI44L,CXCL11,CXCL10,ISG20,MALL,ISG15,CH25H,EVI2B,EFNB2,IFI44,COL1A2,GBP1,IFIH1,CLU,OAS1,OAS2,DAAM1,CCL5,GPRC5A,BCHE,CD24,ADAM28,IDO1,IFIT3,IFIT2,IFIT7,OASL                                                                                        | Genes up-regulated in CT60/4 cells (breast cancer reverted to normal by transfer of chromosome 8p region) vs parental MDA-MB-231 cells (deleted chromosome 8p). | up   | 5.00E-04 |
| M4120  | LOPEZ_MBD_TARGETS                                 | 1748 | 132 | LDHA,RPLP0,PDHA1,SERPING1,SERPINH1,SLC29A2,SERPINA5,SERPINA1,ERRF1,PARVG,LYZ,C7,SORBS1,LRRRC41,AXL,CDH16,HLA-B,CSDA,HLA-E,HLA-F,IFITM3,NR4A1,CDKN1C,CDKN1A,PTTG1IP,FABP1,SDC3,PAX8,APLN,SLC43A1,SLC43A3,CA9,PKM2,RAGE,EHD2,SELPLG,CEBPA,SECTM1,MAL,CD53,C1QC,AL  | Genes up-regulated in HeLa cells (cervical cancer) after simultaneous knockdown of all three MBD (methyl-CpG binding domain) proteins MeCP2                     | up   | 5.00E-04 |
| M999   | HADDAD_T_LYMPHOCYTE_AND_NK_PROGENITOR_DN          | 139  | 23  | SCN3A,SLC2A5,LYZ,TARP,CST7,ZWINT,VCAN,G0S2,CSTA,NPTX2,CD24,MS4A6A,BLNK,TYROBP,PLEK,HCK,LGALS1,RNASE6,TARP,RAB31,CCL3,CCL3L1,IRF8                                                                                                                                 | Genes down-regulated in hematopoietic progenitor cells (HPC) of T lymphocyte and NK (natural killer) lineage.                                                   | up   | 5.00E-04 |
| M3261  | KEGG_TOLL_LIKE_RECEPTOR_SIGNALING_PATHWAY         | 206  | 20  | TLR1,TLR2,TLR3,TLR4,CXCL11,TLR7,TLR8,CXCL10,IL1B,CD40,CCL3,CCL5,CCL4,LBP,IFNAR2,IL12B,CXCL9,PIK3R5,STAT1,CD14                                                                                                                                                    | Toll-like receptor signaling pathway                                                                                                                            | up   | 5.00E-04 |
| M15662 | WATANABE_ULCERATIVE_COLITIS_WITH_CANCER_DN        | 30   | 8   | GBP5,PREX1,SLA,NLRC5,BTN3A1,GBP4,GBP1,LCP2                                                                                                                                                                                                                       | Genes down-regulated in non-neoplastic rectal mucosa samples from patients having cancer associated with ulcerative colitis                                     | up   | 6.00E-04 |
| M7928  | MITSIADES_RESPONSE_TO_APLIDIN_UP                  | 987  | 67  | HIST1H2AD,ISG20,HIST1H2BK,LRRRC2,PEA15,PPP1R3C,ARG2,HLA-DRB6,HLA-DOA,RECQL5,MARCKS,BHLHE41,KSR1,PHLDA1,KCNE4,PHYH,FEM1C,DUSP1,AZGP1,HLA-E,COL1A1,NFE2L2,C3AR1,IFITM3,TIMP1,VDR,TNFSF10,PIP5K1B,RHOB,HCP5,LCK,TSC22D3,SCNN1A,FLT1,TNFSF9,PPARGC1A,CCR2,CHKA,OAS1, | Genes up-regulated in the MM1S cells (multiple myeloma) after treatment with apilidin [PubChem=44152164]                                                        | up   | 6.00E-04 |
| M15940 | NAKAMURA_METASTASIS_MODEL_DN                      | 88   | 16  | IRX3,C3,ALDOC,SFXN3,EHBP1L1,AQP3,CALCA,RAC2,PLAT,UGCG,EOMES,PTHLH,TFPI,DDB2,SERPINB1,PMP22                                                                                                                                                                       | Top genes up-regulated in subcutaneous tumors from highly metastatic pancreatic cancer cells.                                                                   | up   | 6.00E-04 |

|        |                                                          |      |    |                                                                                                                                                                                                                                                                  |                                                                                                                                                                       |      |          |
|--------|----------------------------------------------------------|------|----|------------------------------------------------------------------------------------------------------------------------------------------------------------------------------------------------------------------------------------------------------------------|-----------------------------------------------------------------------------------------------------------------------------------------------------------------------|------|----------|
| M3444  | REACTOME_TRANSMEMBRANE_TRANSPORT_OF_SMALL_MOLECULES      | 438  | 51 | SLC36A2,SLC9A3,SLC2A12,SLC11A1,SLC29A2,SLC28A1,SLC20A2,SLC26A2,G6PC,SLC26A6,SLC39A14,HK2,SLC4A9,SLC15A4,SLC15A3,SLC6A20,SLC44A4,SLC6A3,SLC7A8,SLC7A5,SLC16A1,SLC2A5,SLC2A3,SLC2A1,SLC4A1,SLC4A3,SLC34A1,SLC38A1,SLC38A3,SLC30A2,SLC6A13,SLC6A19,SLC13A1,SLC13A2  | Genes involved in Transmembrane transport of small molecules                                                                                                          | down | 6.00E-04 |
| M9936  | PAPASPYRIDONOS_UNSTABLE_ATHEROSCLEROTIC_PLAQUE_UP        | 111  | 19 | MPEG1,CSF2RB,FCGR3A,FCGR3B,CTSS,HLA-G,CD163,CD84,MLEC,PLA2G7,RSAD2,IFI30,RNASET2,IDH1,MS4A4A,NCKAP1L,CCL18,SOD2,IFIT3                                                                                                                                            | Genes up-regulated in unstable atherosclerotic plaques compared to the stable ones.                                                                                   | up   | 7.00E-04 |
| M9673  | ZHOU_INFLAMMATORY_RESPONSE_LPS_UP                        | 908  | 84 | PTGS2,LTBP4,ISG15,CH25H,SCN2B,SSTR2,MAPK4,RTP4,HSPA1A,AHNAK2,SLC28A1,MARCKS,GOS2,IL12B,ARL4D,CCL20,MT1G,MXRA5,CCL18,RNF19B,ADH1B,CXCL11,GLYATL1,CXCL10,MOBK2A,IL1B,ELOVL7,RELB,HSPB7,TNFAIP2,TM4SF18,CCL4,ANGPTL1,NBN,SLFN5,CCR2,FRMD7,EFCAB4B,TNFSF9,IFIT3,I    | Genes up-regulated in macrophages by P.gingivalis LPS (lipopolysaccharide).                                                                                           | up   | 7.00E-04 |
| M9143  | FRIDMAN_SENESCENCE_UP                                    | 156  | 32 | HTATIP2,MMP1,CDKN2A,CDKN2B,ISG15,CTGF,RHOB,CRYAB,IFI16,CCND1,F3,IGSF3,COL1A2,MDM2,TFAP2A,TNFAIP3,TNFAIP2,CYP1B1,VIM,ESM1,PEA15,HSPA2,FN1,S100A11,SPARC,STAT1,CDKN1C,RAB31,CDKN1A,SMPD1,IGFBP2,IGFBP3                                                             | Genes up-regulated in senescent cells.                                                                                                                                | up   | 7.00E-04 |
| M3652  | DER_IFN_ALPHA_RESPONSE_UP                                | 116  | 20 | PMAIP1,ISG15,PDXK,BST2,HLA-A,HLA-C,IFI16,HLA-E,GBP1,NMI,TRIM14,PML,OAS1,OAS2,IFI35,TAP1,STAT1,TRIM21,IFIT3,IRF1                                                                                                                                                  | Genes up-regulated in HT1080 cells (fibrosarcoma) by treatment with interferon alpha for 6 h.                                                                         | up   | 7.00E-04 |
| M19745 | TARTE_PLASMA_CELL_VS_PLASMABLAST_DN                      | 631  | 52 | LDHB,KIFC1,PDLIM1,CD52,GLDC,GIT2,LILRB4,AHCY,LMNB1,NEK2,IFI30,CD70,IDH2,MKI67,LGALS1,GGH,S100A10,TOP2A,GZMB,DHFR,CLIC1,CCND2,HMMR,CLEC2B,SELL,CD180,SOD2,LSP1,CCNB1,YWHAH,PGK1,HPGD,TTK,SLC7A5,SLC16A1,TMSB10,MVP,ARHGDI3B,ARID3A,PSMB8,CDKN1A,CORO1A,KIF23,CYTI | Genes down-regulated in mature plasma cells compared with plasmablastic B lymphocytes.                                                                                | up   | 7.00E-04 |
| M13984 | MARZEC_IL2_SIGNALING_UP                                  | 216  | 29 | TNFSF14,CXCL12,IL10,TGFB1,AHR,CCL3,TNFRSF12A,HSPA1B,WT1,LIF,PEA15,PTPN7,TNFSF10,ACVR1B,CSF2RB,RHOB,MYC,TNFRSF9,SERPINB9,CCND1,CCND2,HK2,TRIB3,TNFRSF1B,BCL2,IL10RA,PHLDA1,IL2RB,BIRC3                                                                            | Genes up-regulated by IL2 [GeneID=3558] in cells derived from CD4+ [GeneID=920] cutaneous T-cell lymphoma (CTCL).                                                     | up   | 7.00E-04 |
| M12480 | LINDSTEDT_DENDRITIC_CELL_MATURATION_B                    | 96   | 17 | NBN,CYTIP,MARCKSL1,CXCR4,TAP1,IL15RA,TNIP1,CSF2RA,LYN,RELB,BIRC3,SLAMF1,TNFRSF9,ADM,MARCKS,TNFAIP3,TNFAIP2                                                                                                                                                       | Maturation of monocyte-derived dendritic cells (DC) in response to inflammatory stimuli: genes up-regulated both at 8 hr and 48 hr after the stimulation (cluster B). | up   | 7.00E-04 |
| M2761  | NAKAYAMA_SOFT_TISSUE_TUMORS_PCA2_UP                      | 183  | 24 | NRP2,CRABP1,FGF9,SLC7A5,TOP2A,ASPM,PITX1,NUSAP1,FGFR3,NEK2,TNC,HMMR,COL9A3,HJURP,NPTX2,BUB1,ENO2,AHNAK2,PLP2,HS3ST3A1,MKI67,CENPF,CCNB1,KIF20A                                                                                                                   | Top 100 probe sets contributing to the positive side of the 2nd principal component; associated with adipocytic differentiation.                                      | up   | 7.00E-04 |
| M16036 | CHANDRAN_METASTASIS_UP                                   | 226  | 20 | SLC7A5,SLC16A1,TYRO3,WNK1,TMSB10,DDIT4,VEGFA,NGF,HSPA1A,PVT1,P4HA1,LYN,VCAN,HSPA1A,HSPA1B,GRAMD4,HSPA6,HS6ST1,THBS2,NUPR1                                                                                                                                        | Genes up-regulated in metastatic tumors from the whole panel of patients with prostate cancer.                                                                        | up   | 7.00E-04 |
| M12101 | REACTOME_P130CAS_LINKAGE_TO_MAPK_SIGNALING_FOR_INTEGRINS | 32   | 6  | APBB1IP,VWF,FGG,FGA,FGB,FN1                                                                                                                                                                                                                                      | Genes involved in p130Cas linkage to MAPK signaling for integrins                                                                                                     | up   | 7.00E-04 |
| M9911  | WOO_LIVER_CANCER_RECURRENCE_DN                           | 162  | 31 | ACOX2,Ppara,CYP2J2,ALDH1L1,ADH1B,MAT1A,DAO,PCYT2,SARDH,HPD,SUOX,CYB5A,SERPING1,POR,G6PC,HNF4A,ACAA1,ACADSB,ADH6,AASS,ECHS1,PAH,PIPOX,FMO4,ACY1,PCK2,MTTP,CYP4F3,CYP4F2,DCXR,PC                                                                                   | Genes negatively correlated with recurrence free survival in patients with hepatitis B-related (HBV) hepatocellular carcinoma (HCC).                                  | down | 7.00E-04 |
| M12596 | SETLUR_PROSTATE_CANCER_TMPRSS2_ERG_FUSION_DN             | 42   | 5  | AQP2,KLHL21,MPPED2,ITGAD,CSDC2                                                                                                                                                                                                                                   | Genes down-regulated in prostate cancer samples bearing the fusion of TMPRSS2 with ERG [GeneID=7113;2078].                                                            | down | 7.00E-04 |
| M8451  | SENESE_HDAC3_TARGETS_UP                                  | 1040 | 79 | SERPINE2,SPIRE1,GRB10,PMP22,ESM1,ERRF1,FMNL2,MMP14,CCND2,FOXC1,ARL4C,CCL20,TBC1D4,PHLDA1,HAPLN1,PDK4,CXCL10,SLC2A3,STMN2,ENC1,TCFL5,AKR1B10,TNFAIP3,TM4SF18,IL32,ZNF697,CDKN1C,ACOX2,E2F7,SLFN5,RHOB,IFI16,ANXA4,IFIT3,IFIT2,SLC14A1,EFNA1,IL6ST,PRDM1,SA2,KL    | Genes up-regulated in U2OS cells (osteosarcoma) upon knockdown of HDAC3 [GeneID=8841] by RNAi.                                                                        | up   | 8.00E-04 |

|        |                                                 |     |    |                                                                                                                                                                                                                                                                |                                                                                                                                                                                                                                       |      |          |
|--------|-------------------------------------------------|-----|----|----------------------------------------------------------------------------------------------------------------------------------------------------------------------------------------------------------------------------------------------------------------|---------------------------------------------------------------------------------------------------------------------------------------------------------------------------------------------------------------------------------------|------|----------|
| M11585 | NAGASHIMA_NRG1_SIGNALING_UP                     | 367 | 35 | EDN1,PMAIP1,AQP3,ISG20,GATA2,CTGF,AKIRIN1,VEGFA,LAMC2,MCL1,TNFRSF12A,DUSP10,LIF,ARG2,FBXO41,CDC42EP3,KLF6,NR4A1,HOMER1,ETS2,FERMT2,TNFRSF11B,CXCR4,AE N,SEMA3B,MYC,TNFRSF10B,ADM,CAMK2G,EGLN3,PHLDA1,FLRT3,EPPK1,DUSP1,JD1                                     | Genes up-regulated in MCF7 cells (breast cancer) after stimulation with NRG1 [GeneID=3084] .                                                                                                                                          | up   | 8.00E-04 |
| M2777  | AMIT_SERUM_RESPONSE_240_MCF10A                  | 122 | 14 | OCN,TLR2,TGFA,GBP1,ABLIM3,AKAP12,PRSS8,PGBD5,CD24,PHLDA3,ANGPTL4,ITGA2,CDKN1C,ITGA5                                                                                                                                                                            | Genes whose expression peaked at 240 min after stimulation of MCF10A cells with serum.                                                                                                                                                | up   | 8.00E-04 |
| M1918  | WEST_ADRENOCORTICAL_TUMOR_UP                    | 609 | 46 | PTTG1,ZWINT,STC1,NEK2,SLC31A2,SCD,GGH,HOMER1,MCAM,ANGPT2,TP2A,IGF2,INS-IGF2,EPB41L4B,BUB1,PCSK6,ATP1A1,ACLY,CCNB1,ACSM3,KIF20A,CEP76,PMAIP1,SLC7A5,SLC16A1,TBC1D13,DNAJC6,ASPM,FGFR1OP,TNFAIP3,IL32,PSMB7,HOXA9,RHOBTB3,SLC1A3,TUBA1B,TUBA1C,STOM,NPTX2,GAPDH, | Up-regulated genes in pediatric adrenocortical tumors (ACT) compared to the normal tissue.                                                                                                                                            | up   | 8.00E-04 |
| M19261 | YAGI_AML_WITH_T_8_21_TRANSLOCATION              | 824 | 72 | ADCY7,BTK,APOB,SERPINE2,PRAME,BCR,HLA-DQA1,TFPI,TPSAB1,TPSB2,HLA-DPA1,HLA-DRA,PALM,ACADSB,CD74,HLA-DPB1,MKI67,LGALS1,UBA1,SASH3,LEPROTL1,ARHGEF6,CCND1,CDR1,TPSAB1,TPSB2,PTGDS,HLA-DQB1,GPM6B,ACSM3,NUPR1,FBLN5,HLA-DRB1,AGXT,CDKN2C,MS4A2,CSF3R,CIIA,SOCS3,CS | Genes specifically expressed in samples from patients with pediatric AML (acute myeloid leukemia ) bearing t(8;21) translocation.                                                                                                     | up   | 8.00E-04 |
| M13266 | KEGG_RENAL_CELL_CARCINOMA                       | 142 | 10 | PGF,ARNT2,TGFB1,SLC2A1,TGFA,HIF1A,VEGFA,EGLN3,PIK3R5,ETS1                                                                                                                                                                                                      | Renal cell carcinoma                                                                                                                                                                                                                  | up   | 8.00E-04 |
| M625   | REACTOME_CHEMOKINE_RECEPTORS_BINDING_CHEMOKINES | 112 | 20 | CXCR2,CXCR3,CXCL11,CXCL12,CXCL10,CCL3L1,CXCR4,CXCR7,CCL3L3,CCR1,CCR5,CX3CR1,CCR2,CCL3,CXCL9,CCL5,CCL4,CCL20,CCL21,CXCL16                                                                                                                                       | Genes involved in Chemokine receptors bind chemokines                                                                                                                                                                                 | up   | 8.00E-04 |
| M6744  | COLDREN_GEFITINIB_RESISTANCE_DN                 | 461 | 55 | RAB25,KIAA1522,KRT19,PITPNM3,CGN,TACSTD2,ST14,ATPIF1,LAMC2,EP8L1,SLC2A12,GCNT2,PVRL4,BLNK,CNKS1R,LGALS9,ACPP,SRPX2,AGR2,CYP2J2,NPNT,RAB11FIP4,ANKRD22,DOK7,ESRP2,EHF,DAPP1,EPPK1,TMPRSS4,BIK,TJP3,PRSS2,USP44,OCN,MPZL2,LAD1,ERP27,GRHL1,OVOL2,PPL,ARHGDI3,A   | Genes down-regulated in NSCLC (non-small cell lung carcinoma) cell lines resistant to gefitinib [PubChem=123631] compared to the sensitive ones.                                                                                      | down | 8.00E-04 |
| M13183 | ODONNELL_TARGETS_OF_MYC_AND_TFRC_UP             | 175 | 26 | RARRES3,MPEG1,PTGS1,SLC2A3,IL4R,HLA-DQB1,BTNL9,LYZ,HLA-DQA1,CX3CR1,ABAT,LCP2,FUT6,FAM46C,LLGL2,TSC22D3,HLA-DOB,ZBP1,KLF6,MYO1G,CLK1,ANXA4,LGALS9,SGS1,ALDH2,C1RL                                                                                               | Genes down-regulated in P493-6 cells (B lymphocyte)                                                                                                                                                                                   | up   | 9.00E-04 |
| M15664 | ROSTY_CERVICAL_CANCER_PROLIFERATION_CLUSTER     | 282 | 34 | KIFC1,TTK,PTTG1,MCM10,EIF4EBP1,CDKN2A,ASPM,TMSB10,SPAG5,ZWINT,SLC38A1,NETO2,LMBN1,NEK2,PAQR4,TK1,MKI67,GGH,CELSR3,DHFR,KIF23,E2F8,TP2A,NUSAP1,HMMR,HJURP,BUB1,RAD51AP1,CENPF,KIF18B,MLF1IP,SMC4,CCNB1,KIF20A                                                   | The 'Cervical Cancer Proliferation Cluster' (CCPC): genes whose expression in cervical carcinoma positively correlates with that of the HPV E6 and E7 oncogenes; they are also differentially expressed according to disease outcome. | up   | 9.00E-04 |
| M11720 | BEIER_GLIOMA_STEM_CELL_DN                       | 146 | 16 | HLA-DMA,HLA-DMB,HLA-DRB1,HLA-DMB,HLA-DQB1,HLA-DQA1,CCND1,FAM167A,HLA-DPA1,HLA-DRA,BTN2A2,CD74,LAPTM5,GPNMB,MORN4,IGFBP3                                                                                                                                        | Genes down-regulated in cancer stem cells derived from glioblastoma tumors: CD133+ [GeneID=8842] vs. CD133- cells.                                                                                                                    | up   | 9.00E-04 |
| M15476 | URS_ADIPOCYTE_DIFFERENTIATION_UP                | 124 | 19 | MASP1,APOB,LBP,ALDH6A1,CRYAB,MAP4K3,COL1A2,HSD11B2,TNFAIP2,FXDY1,AGT,TAP1,PLCD1,GPD1,LPL,PLEK,SCD,IGFBP2,FABP7                                                                                                                                                 | Genes up-regulated in primary adipocytes compared to preadipocytes.                                                                                                                                                                   | up   | 9.00E-04 |
| M7272  | KEGG_PARKINSONS_DISEASE                         | 268 | 8  | SLC6A3,NDUFA4L2,UBE2L6,GPR37,UBA1,UCHL1,SLC25A4,UQCRH                                                                                                                                                                                                          | Parkinson's disease                                                                                                                                                                                                                   | up   | 9.00E-04 |
| M12289 | REACTOME_PEPTIDE_LIGAND_BINDING_RECEPTORS       | 348 | 47 | F2RL3,EDN1,CXCL11,CXCL12,CXCL10,GP6R,SSTR2,CCR5,F2,CX3CR1,CCR2,C3AR1,CCL3,BDKRB1,BDKRB2,CCL5,CCL4,NPY5R,NPY,CXCL16,AVPR1B,AVPR1A,SST,CXCR2,CXCR3,EDNRA,KISS1R,CXCR4,CCL3L1,CXCR7,CCL3L3,APLN,CCRL1,KNG1,AVPR2,C3,CXCL9,FPR3,NMB                                | Genes involved in Peptide ligand-binding receptors                                                                                                                                                                                    | up   | 9.00E-04 |
| M9450  | REACTOME_PLATELET_ADHESION_TO_EXPOSED_COLLAGEN  | 30  | 8  | LYN,ITGA2,VWF,GP6,CD36,COL1A2,FCER1G,COL1A1                                                                                                                                                                                                                    | Genes involved in Platelet Adhesion to exposed collagen                                                                                                                                                                               | up   | 9.00E-04 |
| M205   | WEST_ADRENOCORTICAL_TUMOR_MARKERS_UP            | 49  | 11 | NEK2,IL32,PMAIP1,NPTX2,STC1,IGF2,INS-IGF2,PCSK6,TP2A,ASPM,KIF20A                                                                                                                                                                                               | Top up-regulated genes in pediatric adrenocortical tumors (ACT) compared to the normal tissue.                                                                                                                                        | up   | 0.001    |

|        |                                                       |      |     |                                                                                                                                                                                                                                                                  |                                                                                                                                                                                             |      |       |
|--------|-------------------------------------------------------|------|-----|------------------------------------------------------------------------------------------------------------------------------------------------------------------------------------------------------------------------------------------------------------------|---------------------------------------------------------------------------------------------------------------------------------------------------------------------------------------------|------|-------|
| M18058 | WILCOX_PRESPONSE_TO_ROGESTERON_E_UP                   | 327  | 33  | HMGN3,CEP76,CDKN2C,ASPM,PTHLH,TNFAIP6,TK1,PPL,IDH1,KLF6,SCD,ABCG1,NPY,NKG7,KCNJ16,SYNPO2L,EVI2A,SMPDL3A,HMOX1,TOP2A,CCR1,1,NUSAP1,IFNAR2,HMMR,HJURP,P,CSK6,SHMT1,MT1M,CENPF,NPY1R,MLF1IP,CCNB1,KIF20A                                                            | Genes up-regulated in primary cultures of ovarian surface epithelium cells exposed to progesterone [PubChem=5994] for 5 days.                                                               | up   | 0.001 |
| M17730 | GRAHAM_CML_QUIESCENT_VS_NORMAL_DIVIDING_UP            | 145  | 22  | PTGS2,PMAIP1,CXCL11,CXCL10,HIST1H2BK,IL1B,TPSB2,DDIT4,TPSAB1,TPSB2,GBP1,CYP1B1,XIST,APOC1,CCL5,CCL20,HIST1H2BK,SOD2,RGS1,CCL3,CCL3L1,TPSAB1                                                                                                                      | Genes up-regulated in quiescent CD34+ [GeneID=8842] cells isolated from peripheral blood of CML (chronic myeloblastic leukemia) patients compared to the dividing cells from normal donors. | up   | 0.001 |
| M6444  | NUYTEN_NIPP1_TARGETS_UP                               | 1382 | 101 | PTGS2,TMEM140,ISG20,ACTG2,ISG15,HIST1H2BK,CTGF,GBP5,GRB10,RTP4,MST1,TCF4,APOL2,PARP9,CYP2J2,BNIP3,P4HA1,FGF1,MMP13,G0S2,HIST1H2AD,PML,HK2,ITM2C,CCL20,DGKD,MT1E,TBC1D7,WIPF1,MT1G,FLRT3,PDK1,MT1X,ACCN2,DUSP1,SH2D5,SAMD4A,VAMP4, TNFAIP3,NETO2,NR4A1,TNFSF10,NB | Genes up-regulated in PC3 cells (prostate cancer) after knockdown of NIPP1 [GeneID=5511] by RNAi.                                                                                           | up   | 0.001 |
| M3026  | CHUNG_BLISTER_CYTOTOXICITY_UP                         | 294  | 29  | CNDP2,C1QC,ALDH6A1,CD3D,GNLY,SERPING1,HCST,C1QB,CCR5,TNFAIP3,TPI1,HAVCR2,TIGIT,KLRC1,KLRC2,CDKN1A,ADAP2,MIR155HG,CD8B,SLC1A4,SLC43A3,GZMB,CYB5A,DDB2,PLIN2,MT1E,MT1F,PCK2,PHYH                                                                                   | Genes up-regulated in blister cells from patients with adverse drug reactions (ADR).                                                                                                        | up   | 0.001 |
| M19630 | ZHU_CMV_ALL_UP                                        | 122  | 16  | NAMPT,SLC7A5,CXCL10,ISG15,HLA-E,GBP1,SLC39A14,PML,OAS1,OAS2,CCL5,ENO2,NR4A1,IDO1,TRIM21,IFI27                                                                                                                                                                    | Up-regulated at any timepoint following infection of primary human foreskin fibroblasts with CMV                                                                                            | up   | 0.001 |
| M19667 | CHENG_RESPONSE_TO_NICKEL_ACETATE                      | 58   | 6   | SLA,MS4A6A,MAP1B,APOL1,ABCC3,CP                                                                                                                                                                                                                                  | Genes down-regulated in HPL1D cells (lung epithelium) upon exposure to nickel acetate [PubChem=9756] .                                                                                      | up   | 0.001 |
| M18334 | REACTOME_CLASS_A1_RHODOPSIN_LIKE_RECEPTORS            | 586  | 66  | EDN1,S1PR1,LTB4R,S1PR5,HTR1F,GPER,SSTR2,CCR5,LPAR6,CCR2,HTR6,F2,CX3CR1,BDKRB1,BDKRB2,NPY5R,NPY,AVPR1B,AVPR1A,EDNRA,KISS1R,CCL3L1,CCL3L3,AVPR2,C3,CXCL9,GPR65,FPR3,NMB,CCL20,CCL21,AGT,NPY1R,PTGFR,P2RY13,F2RL3,CXCL11,CXCL12,CXCL10,C3AR1,CCL3,CCL5,CCL4,P2RY8,  | Genes involved in Class A/1 (Rhodopsin-like receptors)                                                                                                                                      | up   | 0.001 |
| M17002 | REACTOME_BILE_SALT_AND_ORGANIC_ANION_SLC_TRANSPORTERS | 26   | 5   | SLC16A1,SLC13A1,SLC13A2,SLC13A3,SLC47A2                                                                                                                                                                                                                          | Genes involved in Bile salt and organic anion SLC transporters                                                                                                                              | down | 0.001 |

<sup>a</sup>Systematic name assigned by Molecular Signatures Database

<sup>b</sup>The number of differential expressed genes between ccRCC normal and tumor samples

<sup>c</sup>Genes differential expressed between Tumor and normal samples with adjust p-value < 0.05 are regarded as contributing gene

<sup>d</sup>Brief description of gene set

<sup>e</sup>up:up regulation of gene set; down: down-regulation of gene set

<sup>f</sup>adjustment is based on Benjamini-Hochberg method

Supplementary Figure 1. RNAseq reveals known gene expression, pathway, and chromosome changes in ccRCC Heatmap of top 10 up/down regulated plus selected genes in ccRCC tumor and normal tissues. The scales of each color are showed in the top.

Supplementary Figure 2. Heatmap of gene expression level in RUNX1-RUNXT1 gene set. (A) Heatmap of 66 differential expressed RUNX1-RUNXT1 related genes, revealed by eight paired ccRCC tumor and normal RNA-seq data. 54 genes up-regulated and 12 genes down-regulated in ccRCC samples. (B) Validation of differential expressed with microarray data consist of 90 ccRCC and 13 normal kidney tissues, similar patten was found campared to result from RNA-seq data. Genes involed in the heatmap from top to bottom are: NETO2, GBP2, VCAN, SLC1A3, PLK2, SERPINA1, TRIB3, IFI16, SLC2A5, LILRB1, GPNMB, CD163, TLR7, OAS2, KLF6, TLR2, NDRG1, TMEM176A, COL1A2, C3AR1, MYOF, STAT1, SIRPA, LAIR1, SLC15A3, NUPR1, TMEM176B, MALL, ENPP2, PHLDA1, VAT1, VSIG4, IFI44, CD180, SOCS3, FNDC3B, CXorf21, CLEC5A, UPP1, ANXA2, SCS5, DNASE2, JAG2, SLAMF8, LAMC1, CD1D, JUN, PTP4A3, SPATS2L, TUBB6, OLR1, BTG1, EMP1, DHRS9, CRHBP, SLC5A3, PALM, LPL, PLAT, ID1, UCHL1, QPRT, ACVR1B, CH25H, HOXA9, TMEM110.



Supplementary Figure 1.

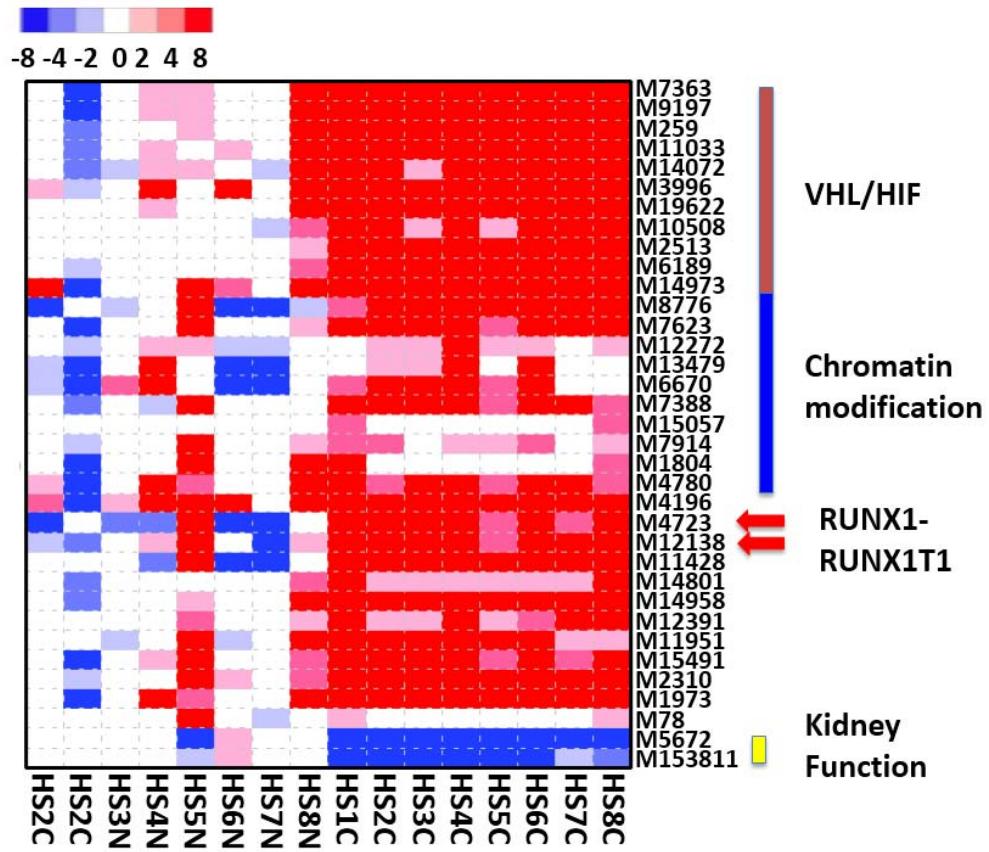

Supplementary Figure 2.

A

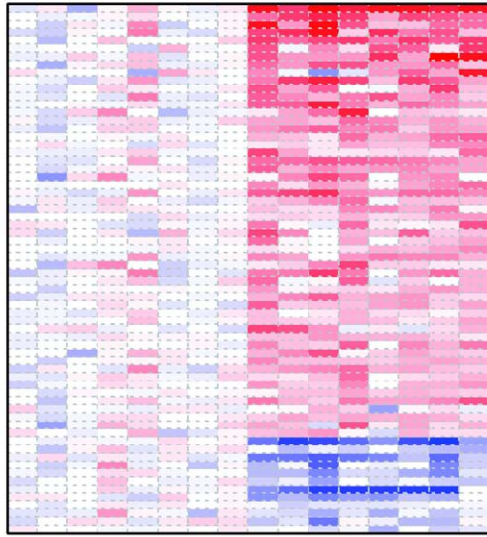

HS1N  
HS2N  
HS3N  
HS4N  
HS5N  
HS6N  
HS7N  
HS8N  
HS1C  
HS2C  
HS3C  
HS4C  
HS5C  
HS6C  
HS7C  
HS8C

B

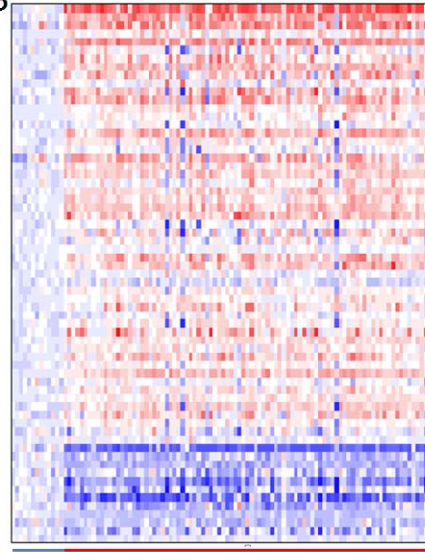

Normal

Tumor

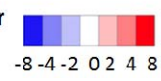

Supplement: f1 [file 450621.f1.pdf]
